# Supplementary material for: Saliniquinone Derivatives, Saliniquinones G−I and Heraclemycin E, from the Marine Animal-Derived Nocardiopsis aegyptia HDN19-252
Source: MDPI journal article supplement (doi:10.3390/md19100575), 2021-10-14
Supplement: s1 [file s1]

Supporting Information for

# Saliniquinone Derivatives, Saliniquinones G–I and Heraclemycin E, from the Marine Animal-derived *Nocardiosis aegyptia* HDN19-252

Luning Zhou <sup>1</sup>, Xuedong Chen <sup>1</sup>, Chunxiao Sun <sup>1</sup>, Yimin Chang <sup>1</sup>, Xiaofei Huang <sup>1</sup>, Tianjiao Zhu <sup>1</sup>, Guojian Zhang <sup>1,2</sup>, Qian Che <sup>1,\*</sup>, and Dehai Li <sup>1,2,\*</sup>

<sup>1</sup> School of Medicine and Pharmacy, Ocean University of China, Qingdao 266003, People's Republic of China; 18895692529@163.com (L.Z.); chenxuedong1206@163.com (X.C.); sunchunxiao93@163.com (C.S.); yiminchang@163.com (Y.C.); hxf17853102898@163.com (X.H.); zhutj@ouc.edu.cn (T.Z.); cheqian064@ouc.edu.cn (Q.C.); dehaili@ouc.edu.cn (D.L.)

<sup>2</sup> Laboratory for Marine Drugs and Bioproducts of Qingdao National Laboratory for Marine Science and Technology, Qingdao, 266237, People's Republic of China; zhangguojian@ouc.edu.cn (G.Z.); dehaili@ouc.edu.cn (D.L.)

\* Correspondence: dehaili@ouc.edu.cn (D.L.); Tel.: 0086-532-82031619; cheqian064@ouc.edu.cn (Q. C.).

## Table of Contents

|                                                                                                                                                                     |    |
|---------------------------------------------------------------------------------------------------------------------------------------------------------------------|----|
| <b>Figure S1.</b> The picture of Antarctica animal .....                                                                                                            | 4  |
| <b>Figure S2.</b> <i>Nocardiopsis aegyptia</i> HDN19-252. ....                                                                                                      | 4  |
| <b>Figure S3.</b> HPLC analysis of the crude extract of HDN19-252. ....                                                                                             | 4  |
| The 16S rRNA sequences data of <i>Nocardiopsis aegyptia</i> HDN19-252. ....                                                                                         | 4  |
| <b>Figure S4.</b> The experimental curves of <b>1</b> and saliniquinones F. ....                                                                                    | 5  |
| <b>Figure S5.</b> Correlation plots of experimental <sup>13</sup> C NMR chemical shifts versus the corresponding calculated data for <b>2a</b> and <b>2b</b> . .... | 6  |
| <b>Figure S6.</b> sDP4+, uDP4+ and DP4+ probabilities (%) for compound <b>2a</b> and <b>2b</b> . ..                                                                 | 6  |
| <b>Table S1.</b> Deviations between the calculated and experimental <sup>13</sup> C NMR chemical shifts for stereoisomers <b>2a</b> and <b>2b</b> . ....            | 6  |
| <b>Figure S7.</b> <sup>1</sup> H NMR (500 MHz, DMSO) spectrum of saliniquinone G ( <b>1</b> ). ....                                                                 | 7  |
| <b>Figure S8.</b> <sup>13</sup> C NMR (150 MHz, DMSO) spectrum of saliniquinone G ( <b>1</b> ). ....                                                                | 7  |
| <b>Figure S9.</b> HSQC spectrum of saliniquinone G ( <b>1</b> ). ....                                                                                               | 8  |
| <b>Figure S10.</b> <sup>1</sup> H- <sup>13</sup> C HMBC spectrum of saliniquinone G ( <b>1</b> ). ....                                                              | 8  |
| <b>Figure S11.</b> <sup>1</sup> H- <sup>1</sup> H COSY spectrum of saliniquinone G ( <b>1</b> ). ....                                                               | 9  |
| <b>Figure S12.</b> NOESY spectrum of saliniquinone G ( <b>1</b> ). ....                                                                                             | 9  |
| <b>Figure S13.</b> HRESIMS spectrum of saliniquinone G ( <b>1</b> ). ....                                                                                           | 10 |
| <b>Figure S14.</b> IR spectrum of saliniquinone G ( <b>1</b> ). ....                                                                                                | 10 |
| <b>Figure S15.</b> <sup>1</sup> H NMR (400 MHz, DMSO) spectrum of saliniquinone H ( <b>2</b> ). ....                                                                | 11 |
| <b>Figure S16.</b> <sup>13</sup> C NMR (150 MHz, DMSO) spectrum of saliniquinone H ( <b>2</b> ). ....                                                               | 11 |
| <b>Figure S17.</b> HSQC spectrum of saliniquinone H ( <b>2</b> ). ....                                                                                              | 12 |
| <b>Figure S18.</b> <sup>1</sup> H- <sup>13</sup> C HMBC spectrum of saliniquinone H ( <b>2</b> ). ....                                                              | 12 |
| <b>Figure S19.</b> <sup>1</sup> H- <sup>1</sup> H COSY HMBC spectrum of saliniquinone H ( <b>2</b> ). ....                                                          | 13 |
| <b>Figure S20.</b> NOESY spectrum of saliniquinone H ( <b>2</b> ). ....                                                                                             | 13 |
| <b>Figure S21.</b> HRESIMS spectrum of saliniquinone H ( <b>2</b> ). ....                                                                                           | 14 |
| <b>Figure S22.</b> IR spectrum of saliniquinone H ( <b>2</b> ). ....                                                                                                | 14 |
| <b>Figure S23.</b> <sup>1</sup> H NMR (400 MHz, DMSO) spectrum of saliniquinone I ( <b>3</b> ). ....                                                                | 15 |
| <b>Figure S24.</b> <sup>13</sup> C NMR (150 MHz, DMSO) spectrum of saliniquinone I ( <b>3</b> ). ....                                                               | 15 |
| <b>Figure S25.</b> HSQC spectrum of saliniquinone I ( <b>3</b> ). ....                                                                                              | 16 |
| <b>Figure S26.</b> <sup>1</sup> H- <sup>13</sup> C HMBC spectrum of saliniquinone I ( <b>3</b> ). ....                                                              | 16 |
| <b>Figure S27.</b> <sup>1</sup> H- <sup>1</sup> H COSY spectrum of saliniquinone I ( <b>3</b> ). ....                                                               | 17 |

|                                                                                                                                                       |    |
|-------------------------------------------------------------------------------------------------------------------------------------------------------|----|
| <b>Figure S28.</b> NOESY spectrum of saliniquinone I ( <b>3</b> ). .....                                                                              | 17 |
| <b>Figure S29.</b> HRESIMR spectrum of saliniquinone I ( <b>3</b> ). .....                                                                            | 18 |
| <b>Figure S30.</b> IR spectrum of saliniquinone I ( <b>3</b> ). .....                                                                                 | 18 |
| <b>Figure S31.</b> $^1\text{H}$ NMR (600 MHz, DMSO) spectrum of heraclemycin E ( <b>4</b> ). .....                                                    | 19 |
| <b>Figure S32.</b> $^{13}\text{C}$ NMR (150 MHz, DMSO) spectrum of heraclemycin E ( <b>4</b> ). .....                                                 | 19 |
| <b>Figure S33.</b> HSQC spectrum of heraclemycin E ( <b>4</b> ). .....                                                                                | 20 |
| <b>Figure S34.</b> $^1\text{H}$ - $^{13}\text{C}$ HMBC spectrum of heraclemycin E ( <b>4</b> ). .....                                                 | 20 |
| <b>Figure S35.</b> $^1\text{H}$ - $^1\text{H}$ COSY spectrum of heraclemycin E ( <b>4</b> ). .....                                                    | 21 |
| <b>Figure S36.</b> NOESY spectrum of heraclemycin E ( <b>4</b> ). .....                                                                               | 21 |
| <b>Figure S37.</b> HRESIMS spectrum of heraclemycin E ( <b>4</b> ). .....                                                                             | 22 |
| <b>Figure S38.</b> IR spectrum of heraclemycin E ( <b>4</b> ). .....                                                                                  | 22 |
| <b>Figure S39.</b> Cartesian coordinates of the low-energy reoptimized conformers of <b>2a</b><br>calculated at B3LYP/6-31+G(d) level of theory. .... | 23 |
| <b>Figure S40.</b> Cartesian coordinates of the low-energy reoptimized conformers of <b>2b</b><br>calculated at B3LYP/6-31+G(d) level of theory. .... | 29 |

**Figure S1.** The picture of Antarctica animal

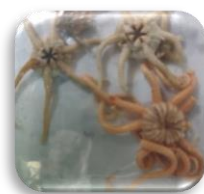

**Figure S2.** *Nocardiopsis aegyptia* HDN19-252.

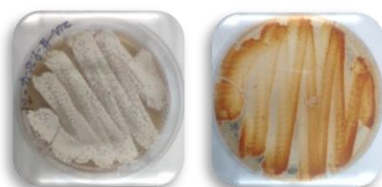

**Figure S3.** HPLC analysis of the crude extract of HDN19-252.

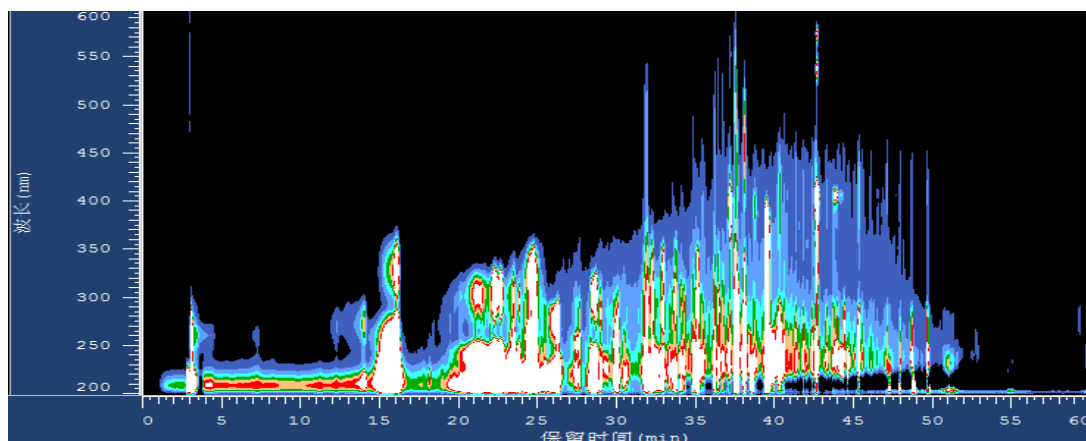

**The 16S rRNA sequences data of *Nocardiopsis aegyptia* HDN19-252.**

```
GGAAGTGCGGCGTGCTACACATGCAGTCGAGCGGTAAGGCCCTTCGGGGTACACGAG
CGGCGAACGGGTGAGTAACACGTGAGCAACCTGCCCCGACTCCGGGATAAGCGGTG
GAAACGCCGTCTAATACCGGATACGACCGGCCACCTCATGGTAGCCGGTGGAAAGTTT
TTCGGTTGGGGATGGGCTCGCGGCCTATCAGCTTGTGGTGGGGTAAAGGCCTACCAA
GGCGATTACGGGTAGCCGGCCTGAGAGGGCGACCGGCCACACTGGGACTGAGACACG
GCCAGACTCCTGCGGGAGGCAGCAGTGGGGAATATTGCGCAATGGGCGAAAGCCTG
ACGCAGCGACGCCGCGTGCGGGGATGACGGCCTTCGGGTTGTAAACCTCTTTTACCACC
AACGCAGGCTCCCAAGTTCTCTGGGGGTTGACGGTAGGTGGGGAATAAGGACCGGCTA
ACTACGTGCCAGCAGCCGCGGTAATACGTAGGGTCCGAGCGTTGTCCGGAATTATTGG
GCGTAAAGAGCTCGTAGGCGGCGTGTGCGCTCTGCTGTGAAAGACCGGGGCTTAACTC
CGGTTCTGCAGTGGATACGGGCATGCTAGAGGTAGGTAGGGGAGACTGGAATTCCTGG
TGTAGCGGTGAAATGCGCAGATATCAGGAGGAACACCGGTGGCGAAGGCGGGTCTCT
GGGCCTTACCTGACGCTGAGGAGCGAAAGCATGGGGAGCGAACAGGATTAGATACCC
TGGTAGTCCATGCCGTAAACGTTGGGCGCTAGGTGTGGGGACTTTCCACGGTTTCCGC
```

GCCGTAGCTAACGCATTAAGCGCCCCGCCTGGGGAGTACGGCCGCAAGGCTAAAACCTC  
 AAAGGAATTGACGGGGGCCCCGCACAAGCGGCGGAGCATGTTGCTTAATTCGACGCAA  
 CGCGAAGAACCTTACCAAGGTTTGACATCACCCGTGGACCTGCAGAGATGTGGGGTCA  
 TTTAGTTGGTGGGTGACAGGTGGTGCATGGCTGTCGTCAGCTCGTGTCGTGAGATGTT  
 GGGTTAAGTCCCGCAACGAGCGCAACCCTTATTCCATGTTGCCAGCACGTAGTGGTGG  
 GGAATCATGGGAGACTGCCGGGGTCAACTCGGAGGAAGGTGGGGACGACGTCAAGTC  
 ATCATGCCCCCTTATGTCTTGGGCTGCAAACATGCTACAATGGCCGGTACAATGGGCGTG  
 CGATACCGTAAGGTGGAGCGAATCCCTAAAAGCCGGTCTCAGTTCGGATTGGGGTCTG  
 CAACTCGACCCCATGAAGGTGGAGTCGCTAGTAATCGCGGATCAGCAACGCCGCGGTG  
 AATACGTTCCCGGGCCTTGTACACACCGCCCGTCACGTCATGAAAGTCGGCAACACCC  
 GAAACTTGTGGCCTAACCCCTTCGGGGAGGGAATGAGGAAGTTGTCCGACTTT

**Figure S4.** The experimental curves of **1** and saliniquinones F.

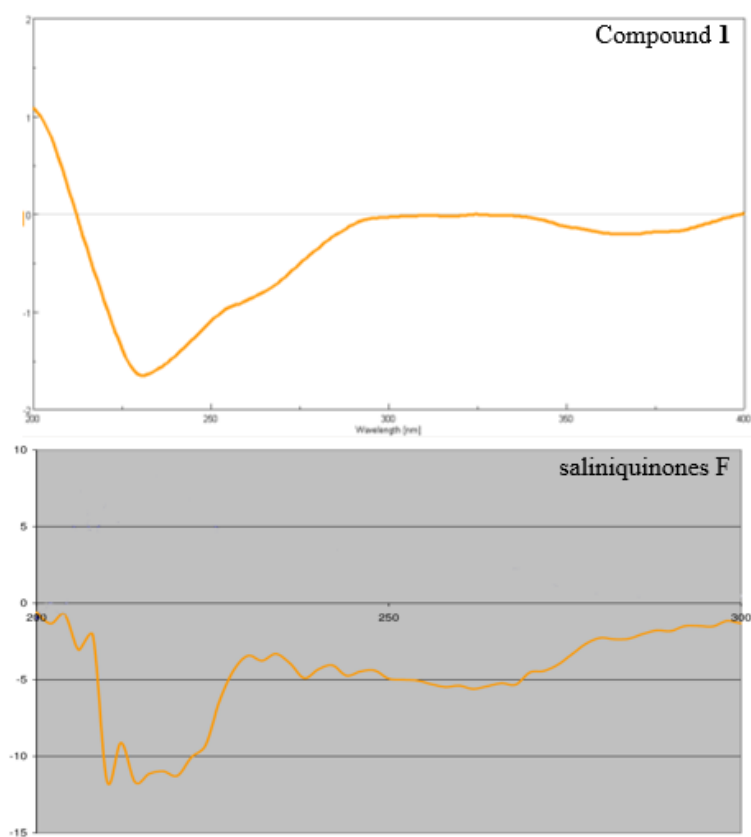

**Figure S5.** Correlation plots of experimental  $^{13}\text{C}$  NMR chemical shifts versus the corresponding calculated data for **2a** and **2b**.

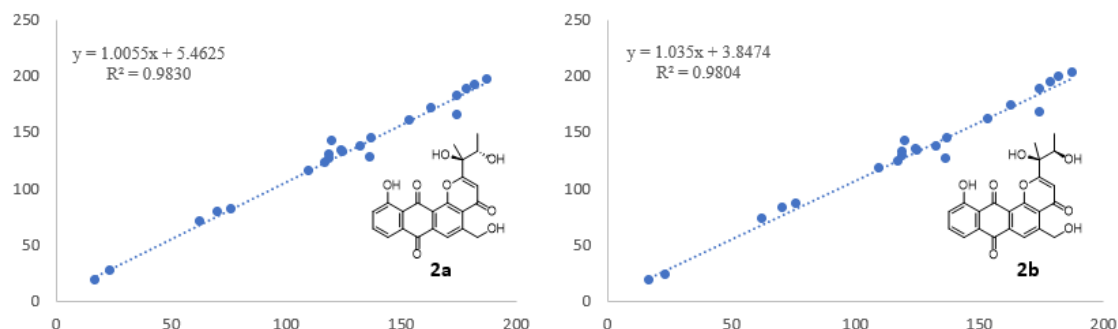

**Figure S6.** sDP4+, uDP4+ and DP4+ probabilities (%) for compound **2a** and **2b**.

| Functional       | Solvent? |          | Basis Set   |          | Type of Data      |          |
|------------------|----------|----------|-------------|----------|-------------------|----------|
| B3LYP            | PCII     |          | 6-311G(d,p) |          | Shielding Tensors |          |
|                  | Isomer 1 | Isomer 2 | Isomer 3    | Isomer 4 | Isomer 5          | Isomer 6 |
| sDP4+ (H data)   | 18.12%   | 81.88%   | –           | –        | –                 | –        |
| sDP4+ (C data)   | 100.00%  | 0.00%    | –           | –        | –                 | –        |
| sDP4+ (all data) | 100.00%  | 0.00%    | –           | –        | –                 | –        |
| uDP4+ (H data)   | 99.96%   | 0.04%    | –           | –        | –                 | –        |
| uDP4+ (C data)   | 100.00%  | 0.00%    | –           | –        | –                 | –        |
| uDP4+ (all data) | 100.00%  | 0.00%    | –           | –        | –                 | –        |
| DP4+ (H data)    | 99.80%   | 0.20%    | –           | –        | –                 | –        |
| DP4+ (C data)    | 100.00%  | 0.00%    | –           | –        | –                 | –        |
| DP4+ (all data)  | 100.00%  | 0.00%    | –           | –        | –                 | –        |

**Table S1.** Deviations between the calculated and experimental  $^{13}\text{C}$  NMR chemical shifts for stereoisomers **2a** and **2b**.

| 2a     |       |       |                |                  | 2b     |       |       |                |                  |
|--------|-------|-------|----------------|------------------|--------|-------|-------|----------------|------------------|
| Calcd. | Exp.  | Scal. | $\Delta\delta$ | $ \Delta\delta $ | Calcd. | Exp.  | Scal. | $\Delta\delta$ | $ \Delta\delta $ |
| 171.6  | 163.3 | 165.2 | -1.9           | 1.9              | 173.7  | 163.3 | 164.2 | -0.9           | 0.9              |
| 132.6  | 125.3 | 126.4 | -1.1           | 1.1              | 133.6  | 125.3 | 125.4 | -0.1           | 0.1              |
| 144.1  | 137.3 | 137.9 | -0.6           | 0.6              | 144.9  | 137.3 | 136.3 | 1.0            | 1.0              |
| 125.9  | 119.3 | 119.8 | -0.5           | 0.5              | 128.3  | 119.3 | 120.2 | -0.9           | 0.9              |
| 137.5  | 132.9 | 131.3 | 1.6            | 1.6              | 136.8  | 132.9 | 128.4 | 4.5            | 4.5              |
| 122.7  | 117.4 | 116.6 | 0.8            | 0.8              | 124.0  | 117.4 | 116.1 | 1.3            | 1.3              |
| 192.2  | 182.3 | 185.7 | -3.4           | 3.4              | 198.7  | 182.3 | 188.3 | -6.0           | 6.0              |
| 142.5  | 120.5 | 136.3 | -15.8          | 15.8             | 141.7  | 120.5 | 133.2 | -12.7          | 12.7             |
| 127.3  | 136.7 | 121.1 | 15.6           | 15.6             | 126.6  | 136.7 | 118.6 | 18.1           | 18.1             |
| 197.1  | 187.7 | 190.6 | -2.9           | 2.9              | 202.8  | 187.7 | 192.2 | -4.5           | 4.5              |
| 129.9  | 119.4 | 123.8 | -4.4           | 4.4              | 132.0  | 119.4 | 123.8 | -4.4           | 4.4              |
| 160.5  | 153.9 | 154.2 | -0.3           | 0.3              | 161.7  | 153.9 | 152.5 | 1.4            | 1.4              |
| 133.5  | 124.6 | 127.3 | -2.7           | 2.7              | 134.4  | 124.6 | 126.2 | -1.6           | 1.6              |
| 164.9  | 174.9 | 158.6 | 16.3           | 16.3             | 167.6  | 174.9 | 158.2 | 16.7           | 16.7             |
| 188.4  | 179.1 | 181.9 | -2.8           | 2.8              | 194.1  | 179.1 | 183.8 | -4.7           | 4.7              |
| 115.9  | 110.2 | 109.8 | 0.4            | 0.4              | 117.7  | 110.2 | 110.0 | 0.2            | 0.2              |
| 182.3  | 174.9 | 175.9 | -1.0           | 1.0              | 188.2  | 174.9 | 178.1 | -3.2           | 3.2              |
| 81.9   | 76.5  | 76.0  | 0.5            | 0.5              | 86.5   | 76.5  | 79.9  | -3.4           | 3.4              |
| 70.7   | 62.9  | 64.9  | -2.0           | 2.0              | 72.6   | 62.9  | 66.4  | -3.5           | 3.5              |



**Figure S9.** HSQC spectrum of saliniquinone G (**1**).

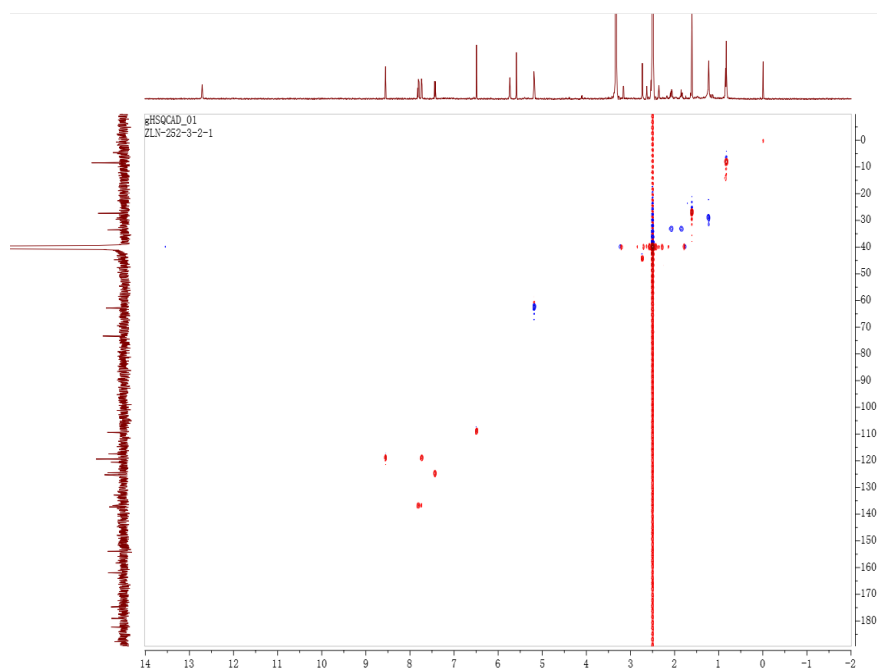

**Figure S10.**  $^1\text{H}$ - $^{13}\text{C}$  HMBC spectrum of saliniquinone G (**1**).

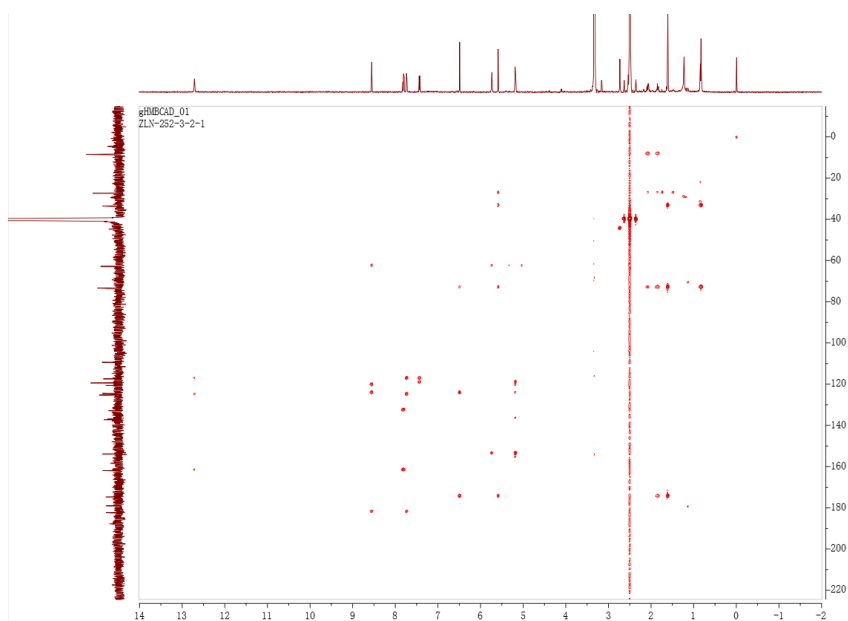



**Figure S11.**  $^1\text{H}$ - $^1\text{H}$  COSY spectrum of saliniquinone G (**1**).

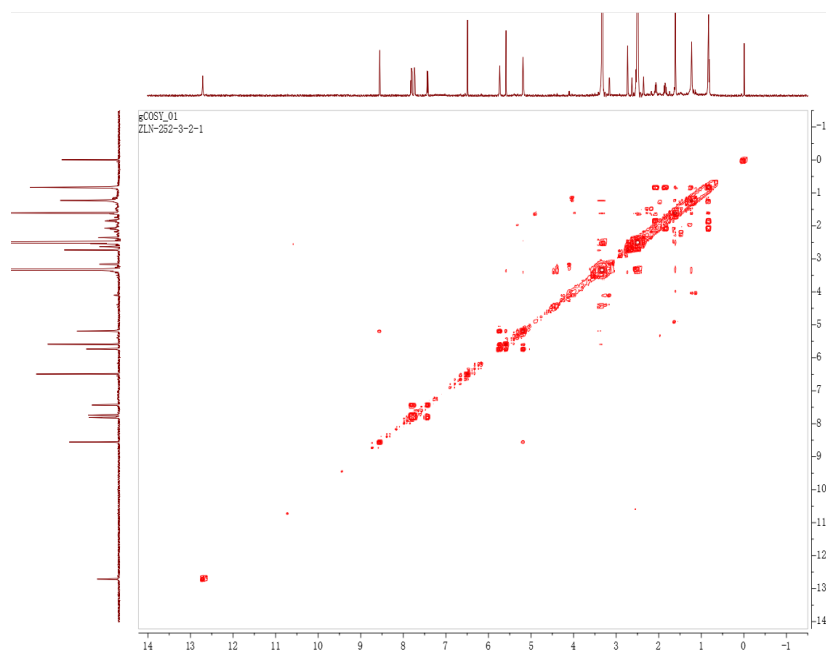

**Figure S12.** NOESY spectrum of saliniquinone G (**1**).

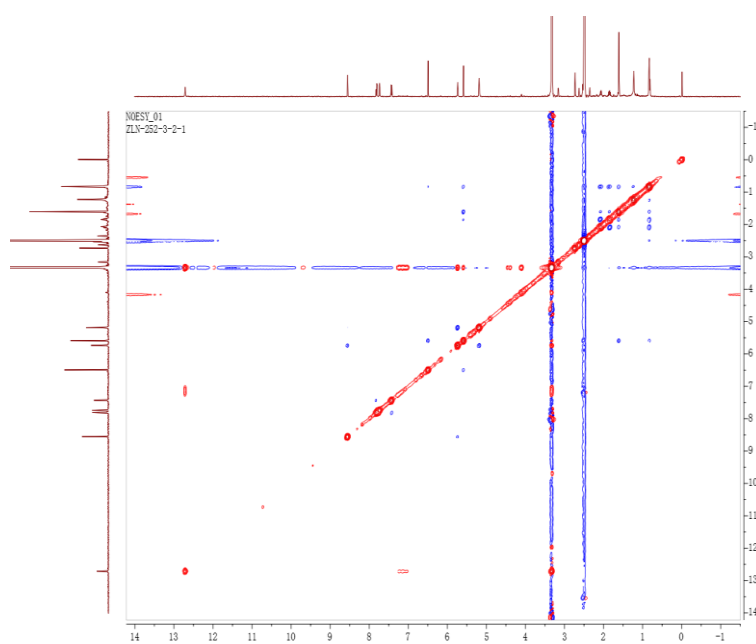

**Figure S13.** HRESIMS spectrum of saliniquinone G (**1**).

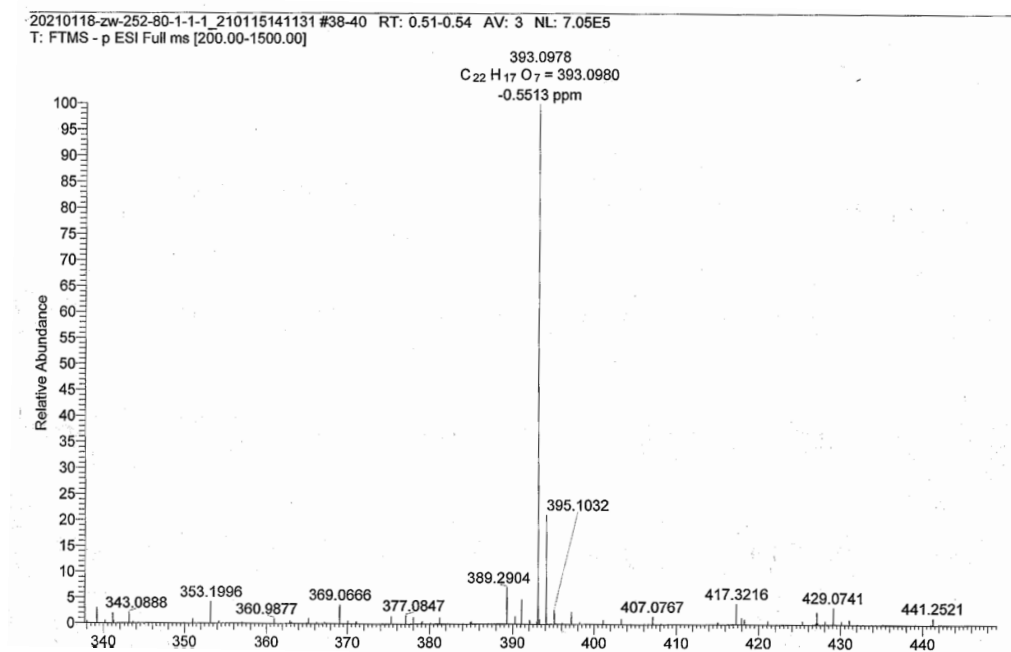

**Figure S14.** IR spectrum of saliniquinone G (**1**).

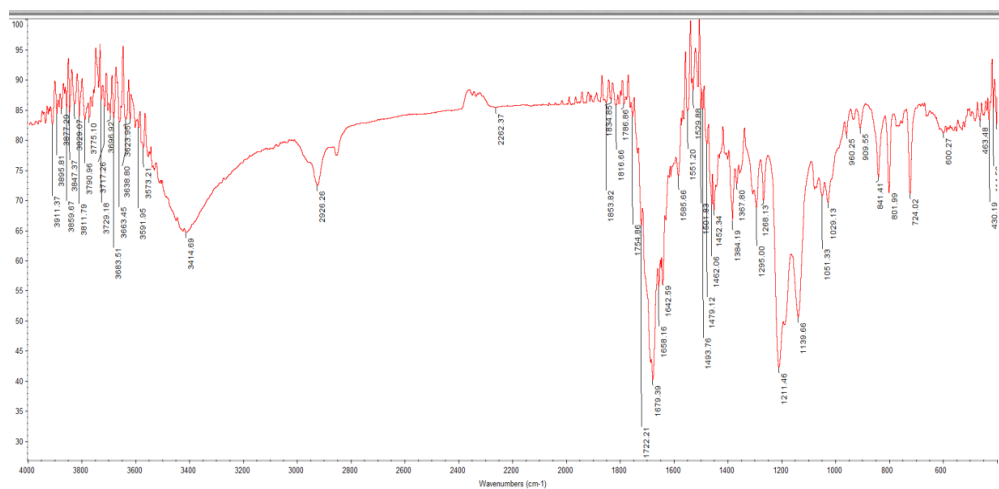

**Figure S15.**  $^1\text{H}$  NMR (400 MHz, DMSO) spectrum of saliniquinone H (**2**).

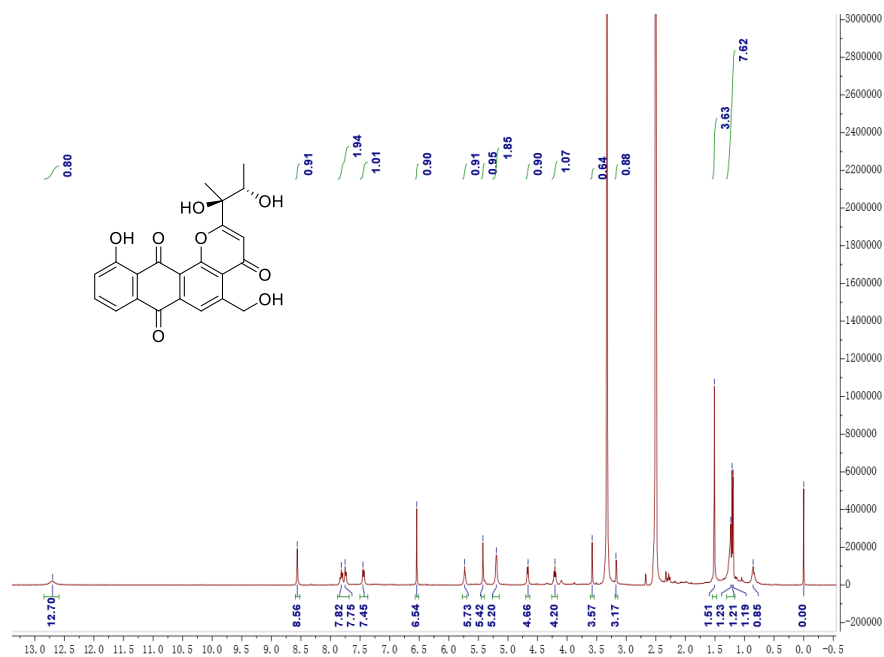

**Figure S16.**  $^{13}\text{C}$  NMR (150 MHz, DMSO) spectrum of saliniquinone H (**2**).

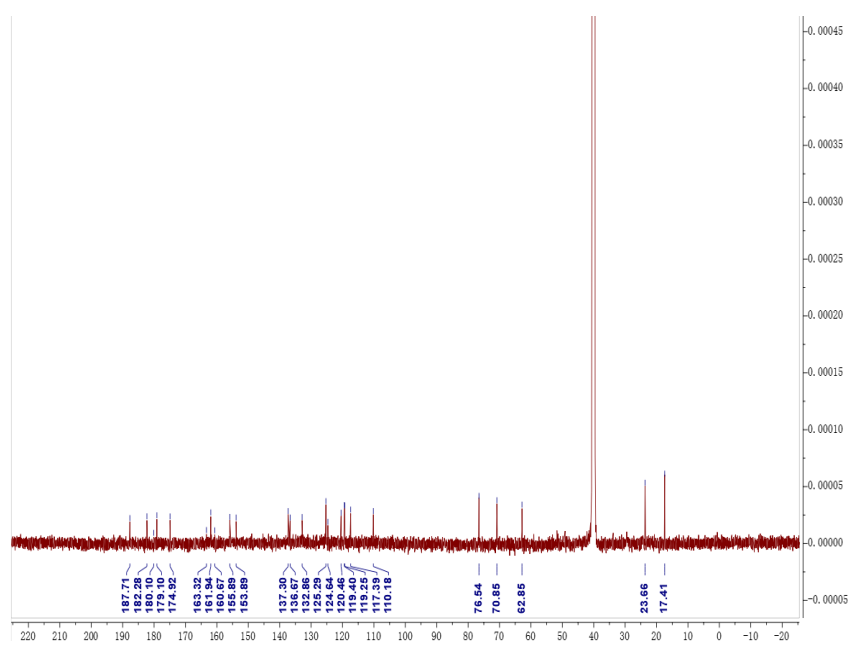

**Figure S17.** HSQC spectrum of saliniquinone H (**2**).

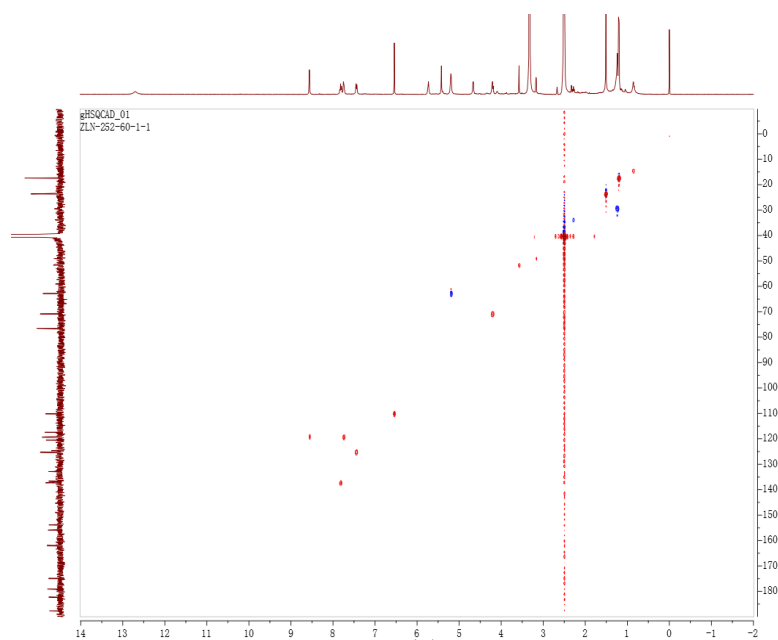

**Figure S18.**  $^1\text{H}$ - $^{13}\text{C}$  HMBC spectrum of saliniquinone H (**2**).

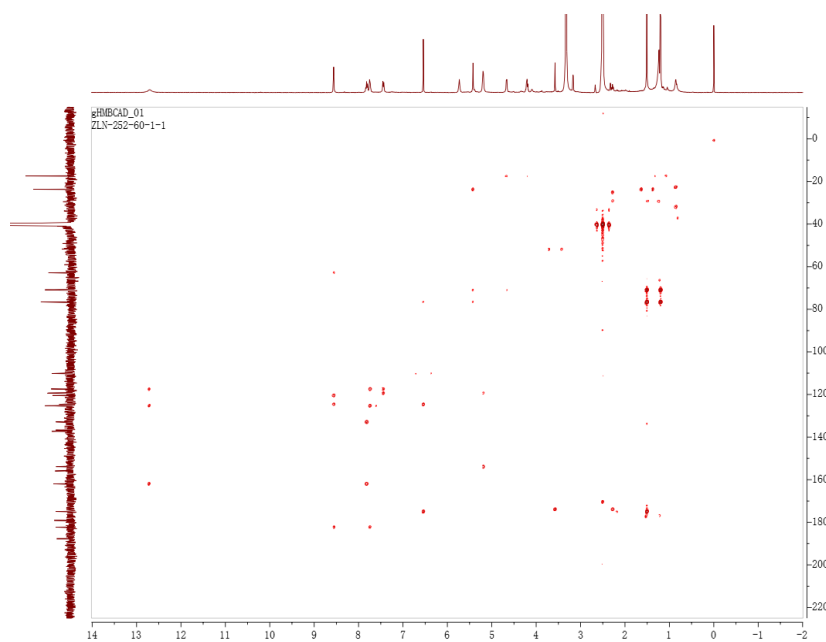

**Figure S19.**  $^1\text{H}$ - $^1\text{H}$  COSY HMBC spectrum of saliniquinone H (**2**).

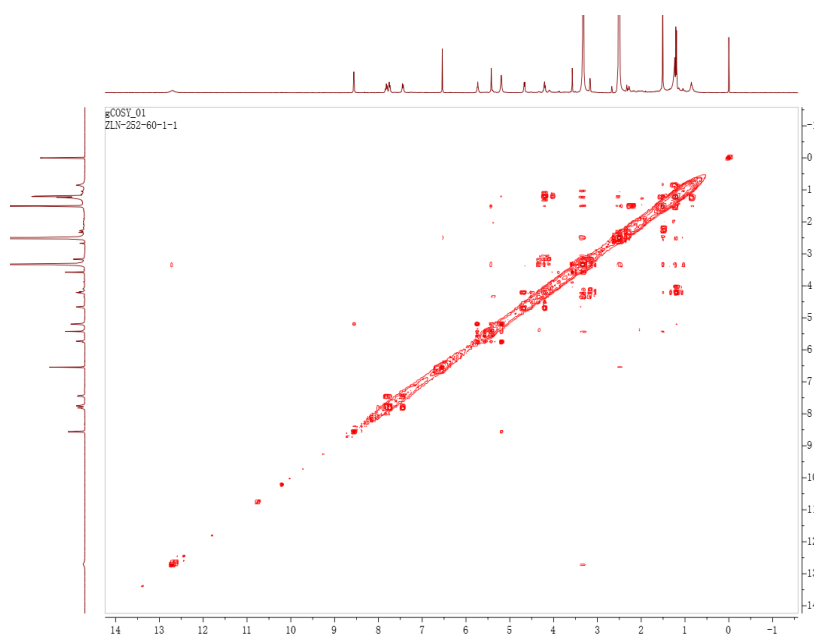

**Figure S20.** NOESY spectrum of saliniquinone H (**2**).

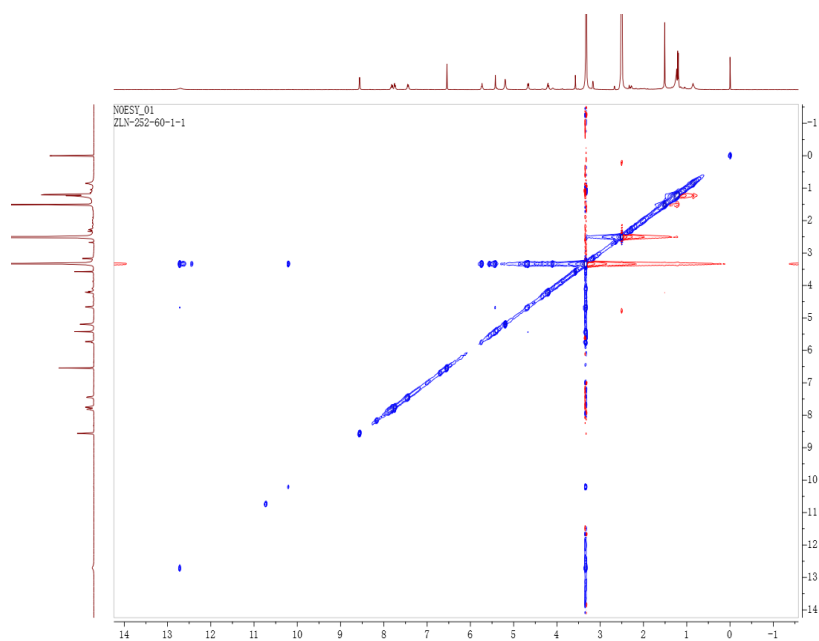

**Figure S21.** HRESIMS spectrum of saliniquinone H (**2**).

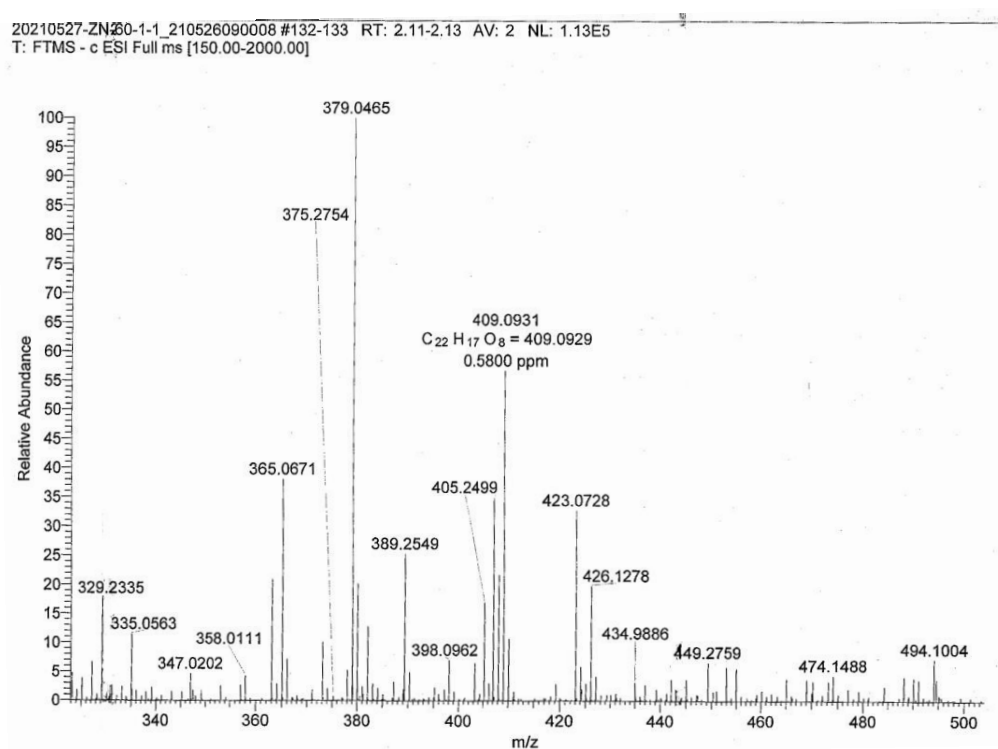

**Figure S22.** IR spectrum of saliniquinone H (**2**).

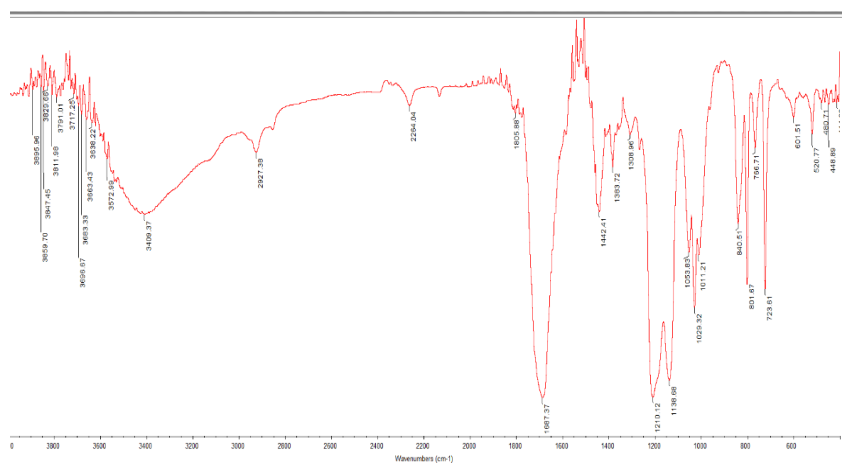

**Figure S23.**  $^1\text{H}$  NMR (400 MHz, DMSO) spectrum of saliniquinone I (**3**).

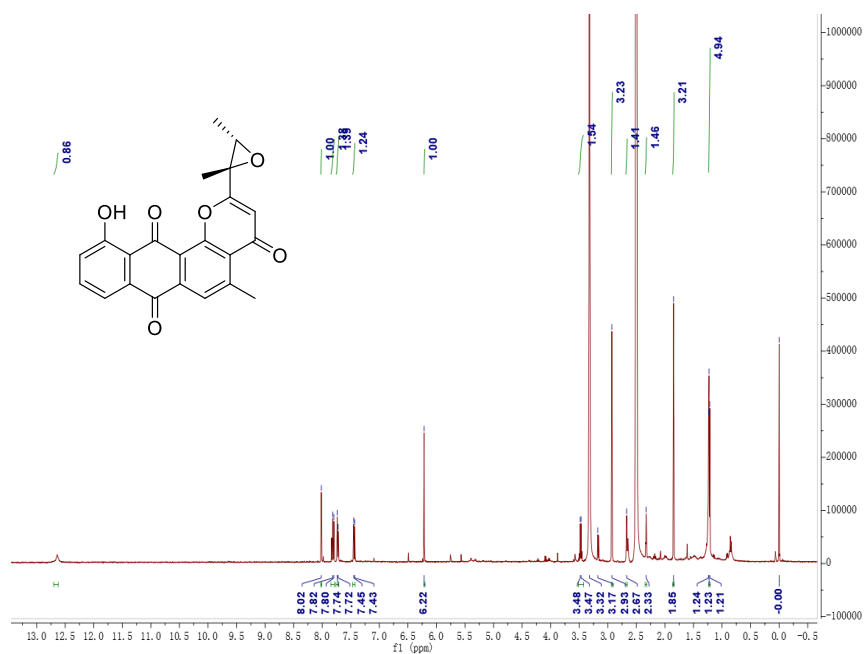

**Figure S24.**  $^{13}\text{C}$  NMR (150 MHz, DMSO) spectrum of saliniquinone I (**3**).

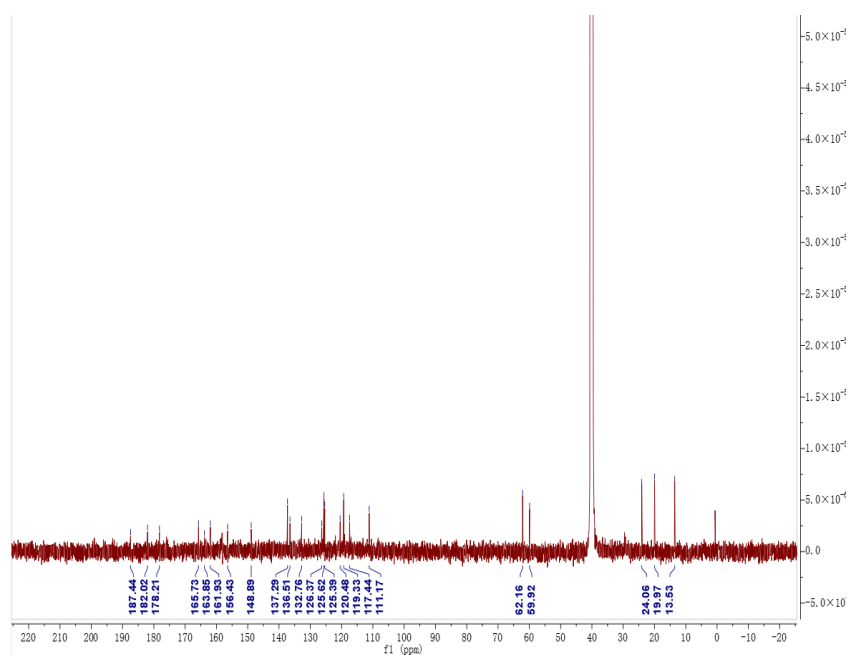

**Figure S25.** HSQC spectrum of saliniquinone I (**3**).

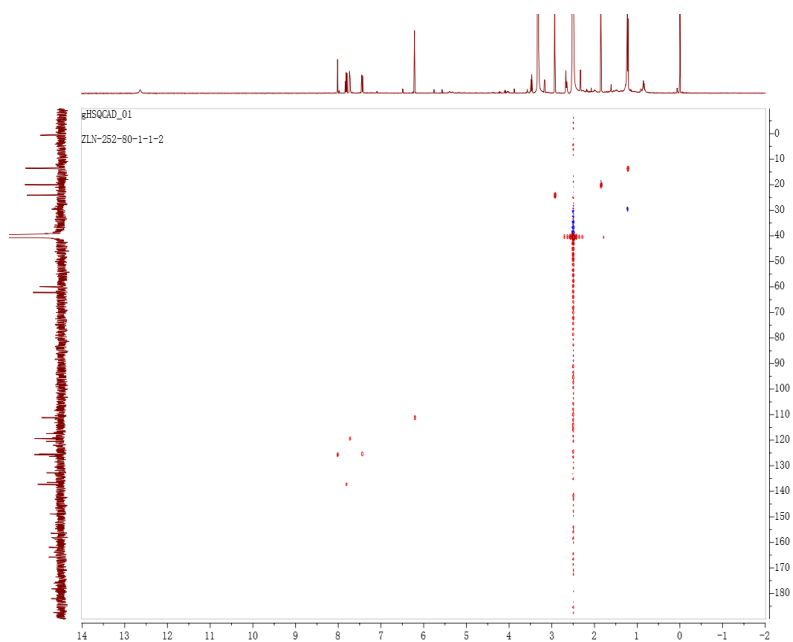

**Figure S26.**  $^1\text{H}$ - $^{13}\text{C}$  HMBC spectrum of saliniquinone I (**3**).

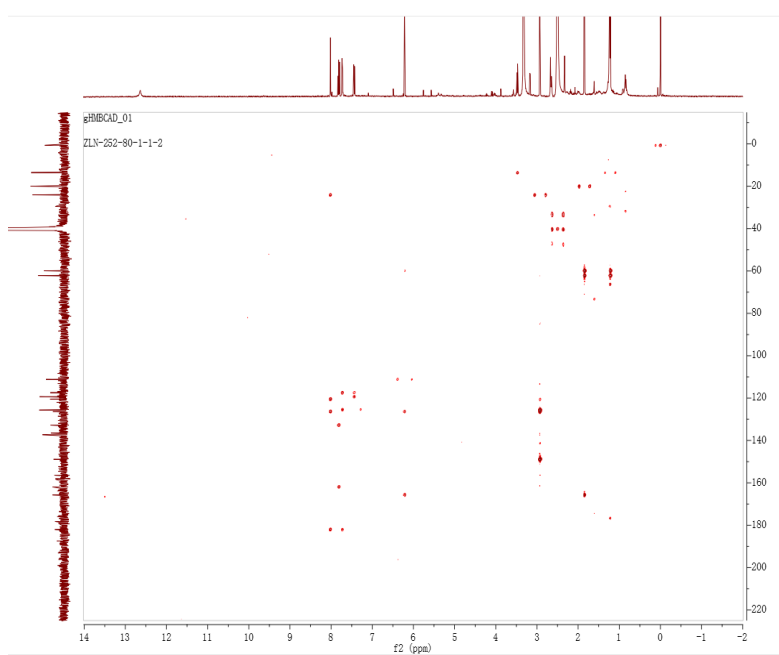



**Figure S27.**  $^1\text{H}$ - $^1\text{H}$  COSY spectrum of saliniquinone I (**3**).

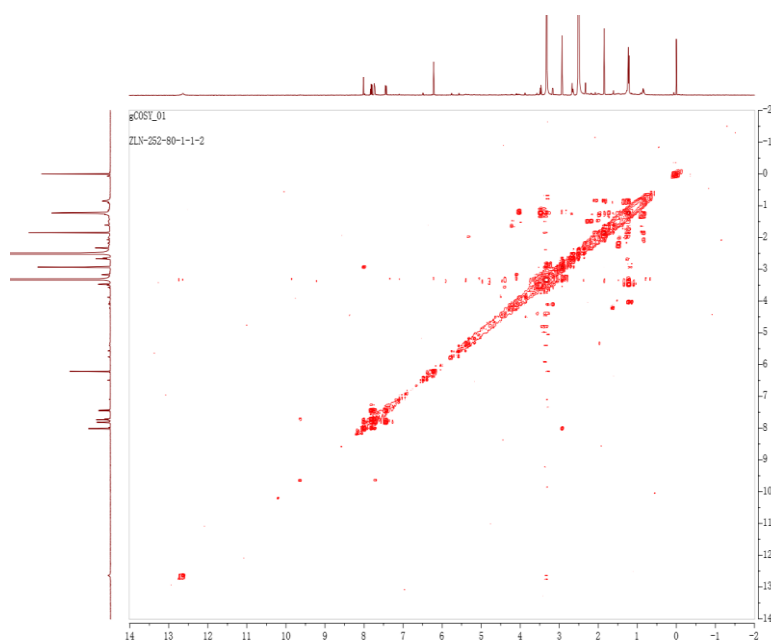

**Figure S28.** NOESY spectrum of saliniquinone I (**3**).

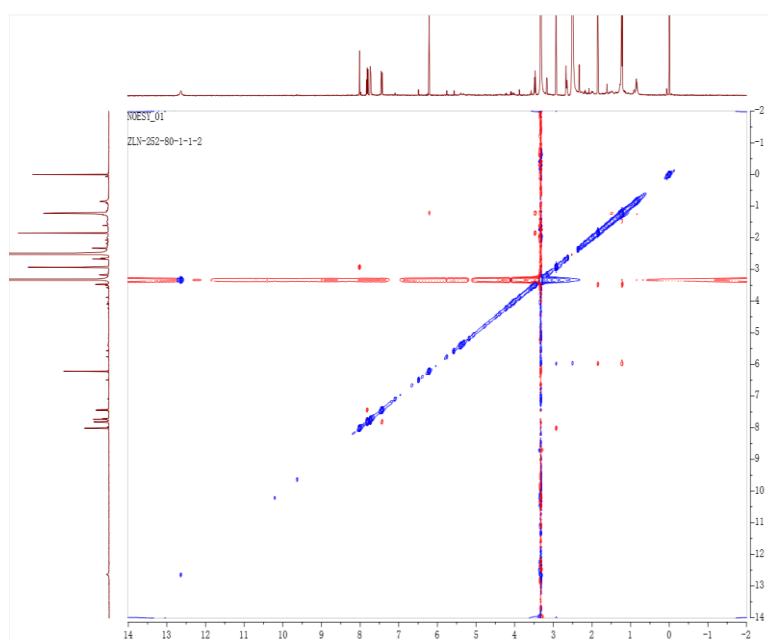

**Figure S29.** HRESIMR spectrum of saliniquinone I (**3**).

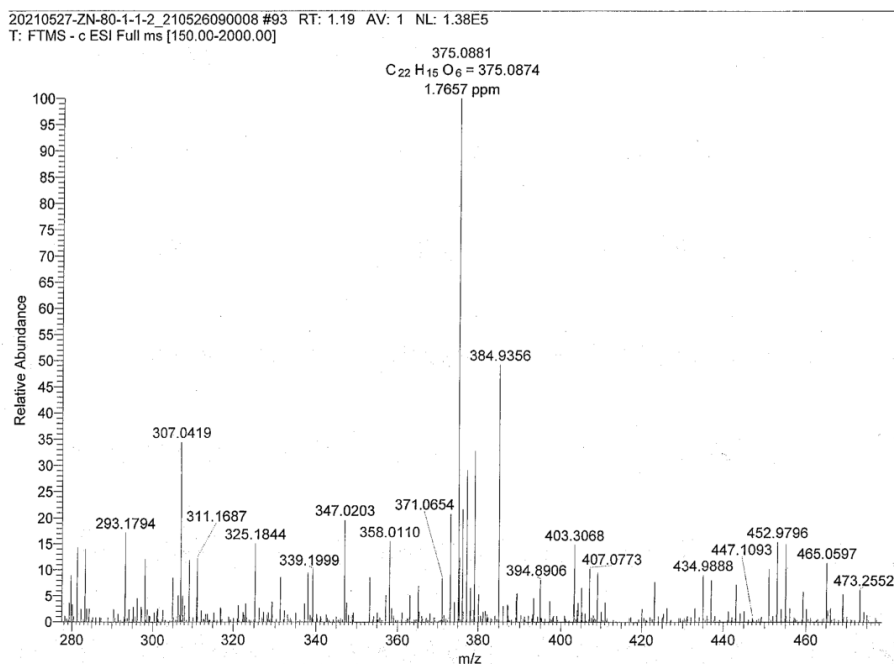

**Figure S30.** IR spectrum of saliniquinone I (**3**).

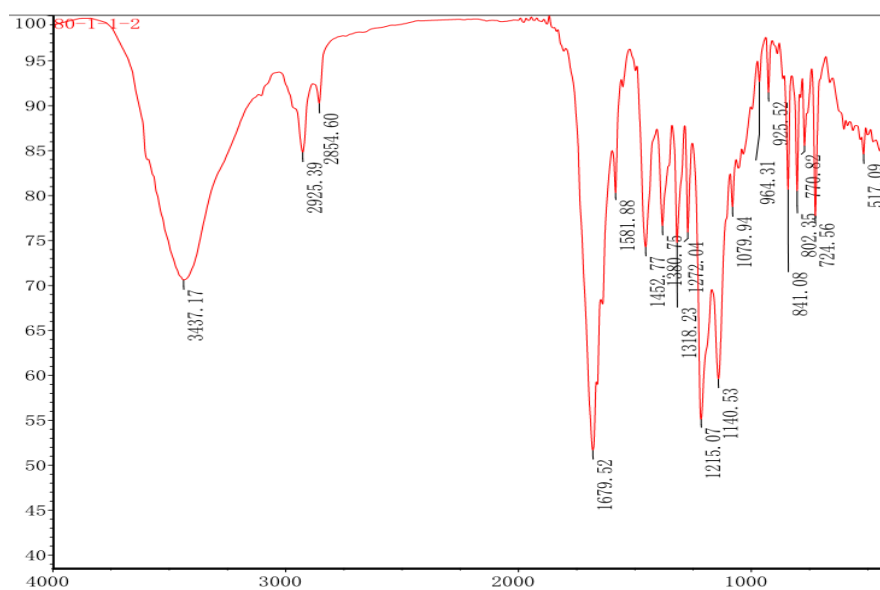

**Figure S31.**  $^1\text{H}$  NMR (600 MHz, DMSO) spectrum of heraclemycin E (**4**).

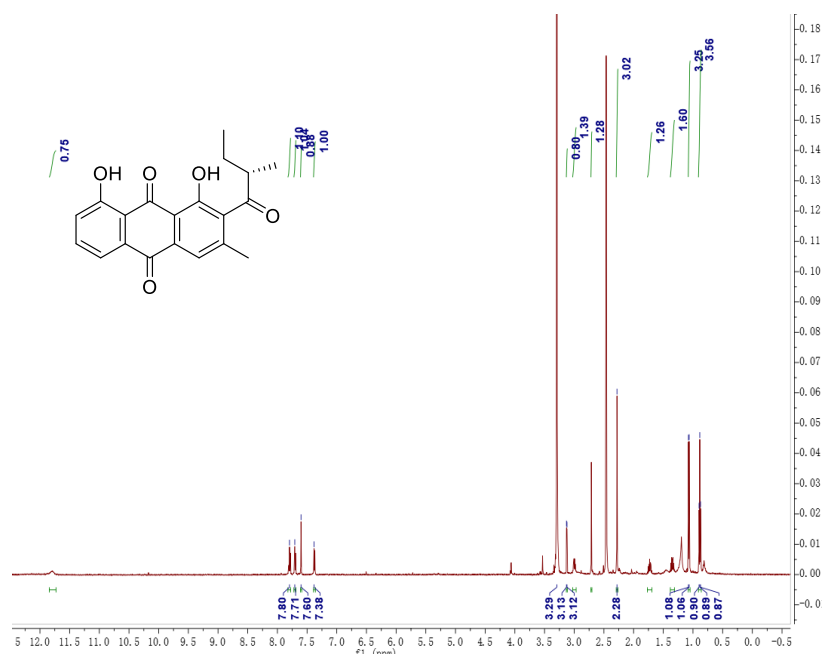

**Figure S32.**  $^{13}\text{C}$  NMR (150 MHz, DMSO) spectrum of heraclemycin E (**4**).

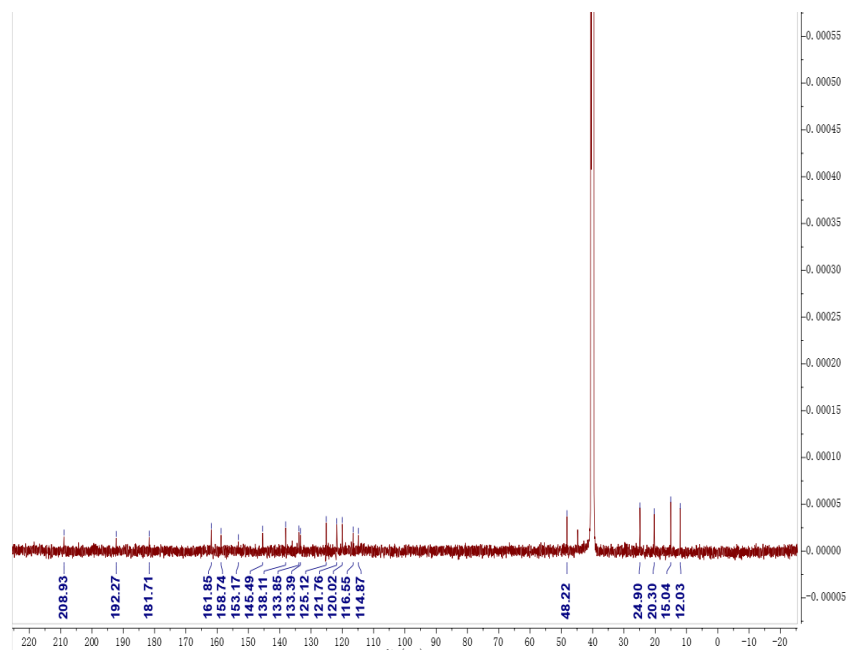

**Figure S33.** HSQC spectrum of heraclemycin E (**4**).

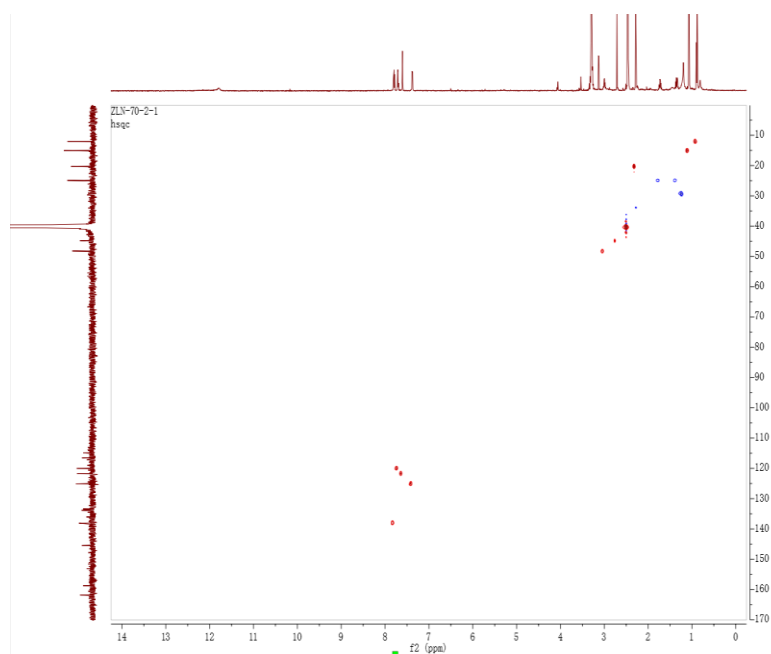

**Figure S34.**  $^1\text{H}$ - $^{13}\text{C}$  HMBC spectrum of heraclemycin E (**4**).

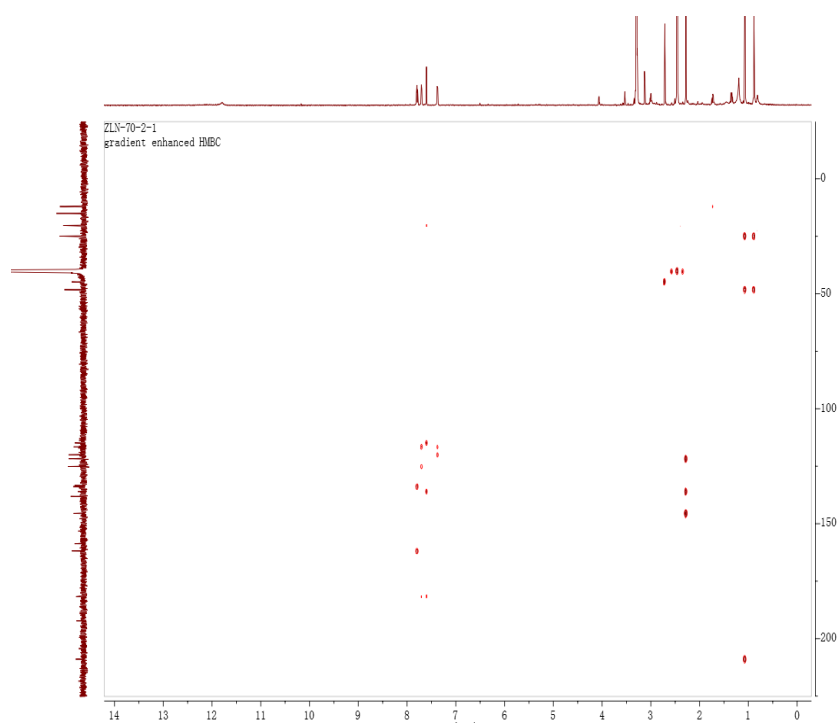

**Figure S35.**  $^1\text{H}$ - $^1\text{H}$  COSY spectrum of heraclemycin E (**4**).

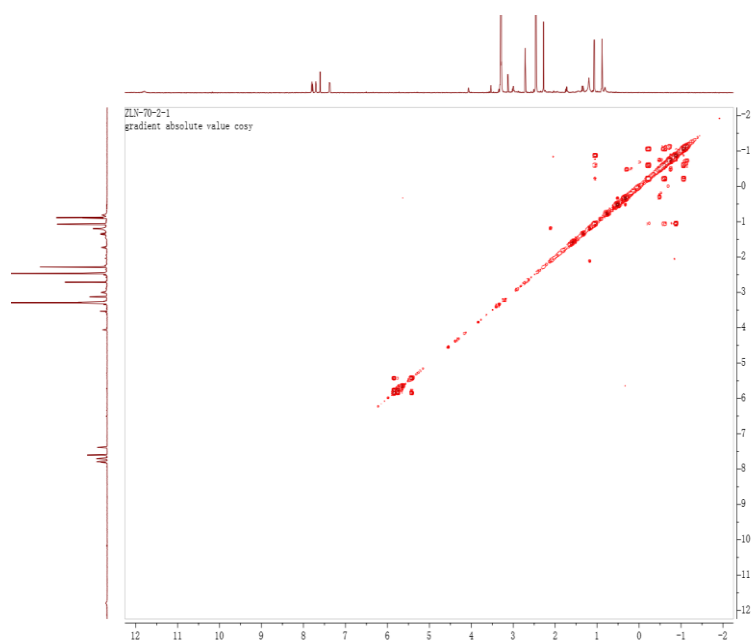

**Figure S36.** NOESY spectrum of heraclemycin E (**4**).

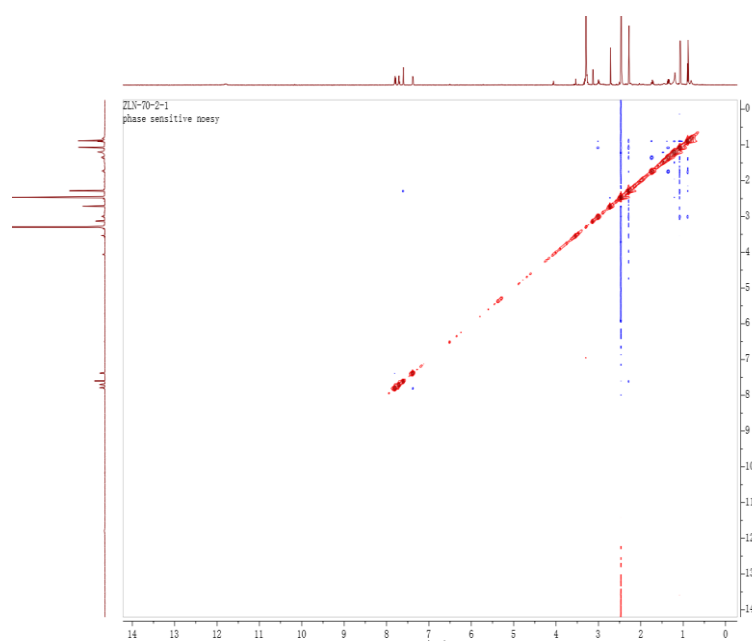

**Figure S37.** HRESIMS spectrum of heraclemycin E (**4**).

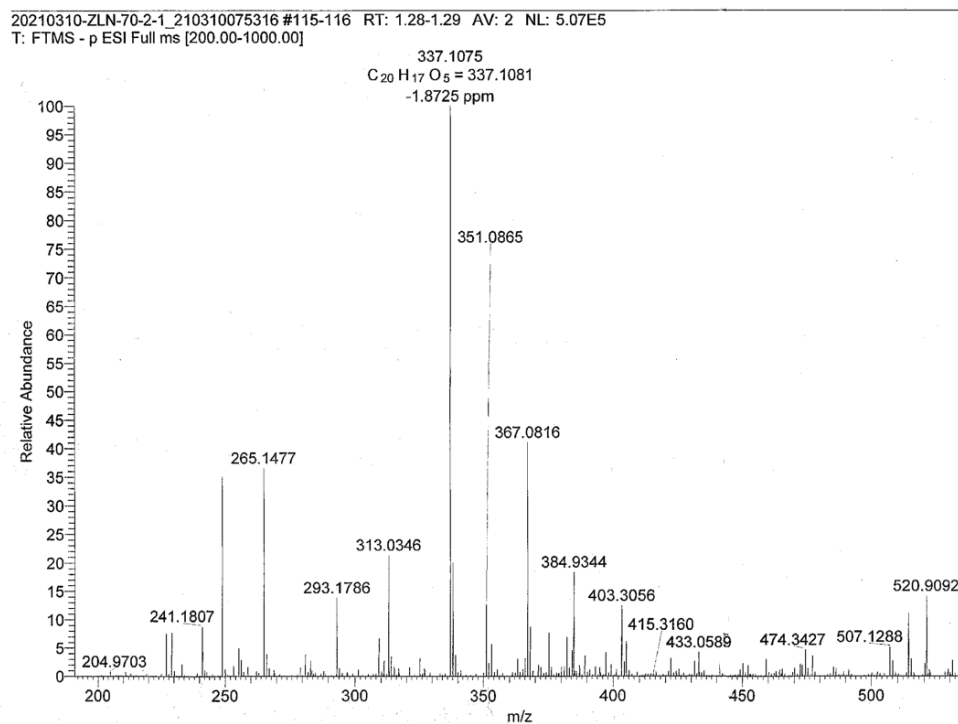

**Figure S38.** IR spectrum of heraclemycin E (**4**).

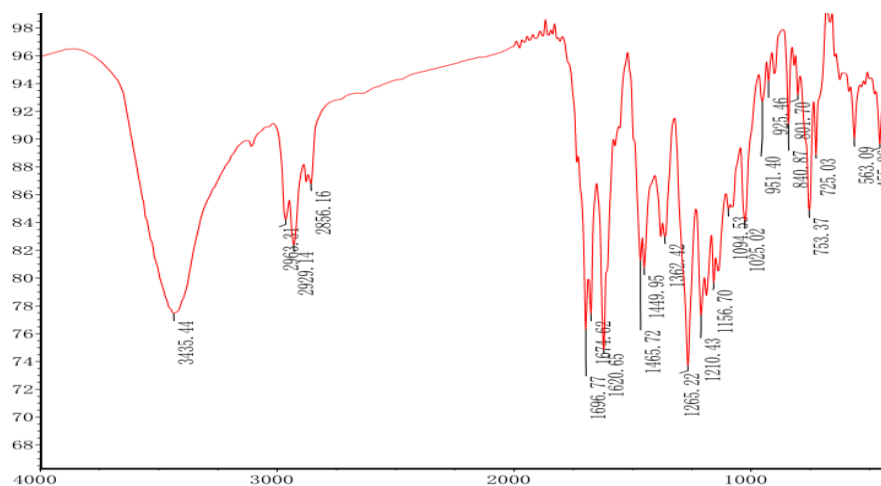

**Figure S39.** Cartesian coordinates of the low-energy reoptimized conformers of **2a** calculated at B3LYP/6-31+G(d) level of theory.

| Conformer A |      | Standard Orientation<br>(Ångstroms) |          |          |
|-------------|------|-------------------------------------|----------|----------|
| I           | Atom | X                                   | Y        | Z        |
| 1           | C    | -3.54319                            | -2.35394 | 0.01547  |
| 2           | C    | -4.94374                            | -2.48386 | 0.06719  |
| 3           | C    | -5.75142                            | -1.35631 | 0.09327  |
| 4           | C    | -5.18513                            | -0.07359 | 0.06869  |
| 5           | C    | -3.80157                            | 0.07004  | 0.01665  |
| 6           | C    | -2.95014                            | -1.06403 | -0.01232 |
| 7           | C    | -3.21950                            | 1.43247  | -0.00650 |
| 8           | C    | -1.72729                            | 1.56179  | -0.06149 |
| 9           | C    | -0.89256                            | 0.43322  | -0.10005 |
| 10          | C    | -1.48582                            | -0.93324 | -0.06871 |
| 11          | C    | -1.19150                            | 2.85432  | -0.07957 |
| 12          | C    | 0.17676                             | 3.08967  | -0.12148 |
| 13          | C    | 1.05891                             | 1.97295  | -0.15370 |
| 14          | C    | 0.50577                             | 0.67249  | -0.16400 |
| 15          | O    | -0.77133                            | -1.95449 | -0.08531 |
| 16          | O    | -3.92673                            | 2.43859  | 0.01707  |
| 17          | C    | 2.53805                             | 2.10383  | -0.19133 |
| 18          | C    | 3.27880                             | 0.87388  | -0.33764 |
| 19          | C    | 2.64779                             | -0.32112 | -0.35096 |
| 20          | O    | 1.30411                             | -0.42433 | -0.24721 |
| 21          | O    | 3.12531                             | 3.20151  | -0.09963 |
| 22          | C    | 3.29402                             | -1.68275 | -0.49803 |
| 23          | C    | 0.64453                             | 4.53740  | -0.16389 |
| 24          | O    | 1.38628                             | 4.93382  | 0.98650  |
| 25          | O    | -2.81850                            | -3.48728 | -0.00642 |
| 26          | C    | 2.96695                             | -2.58628 | 0.73344  |
| 27          | O    | 4.70161                             | -1.46001 | -0.55884 |
| 28          | C    | 2.80482                             | -2.34234 | -1.80464 |
| 29          | C    | 3.26745                             | -1.94426 | 2.08526  |
| 30          | O    | 3.78216                             | -3.75441 | 0.52248  |
| 31          | H    | -5.36727                            | -3.48331 | 0.08619  |
| 32          | H    | -6.83075                            | -1.46951 | 0.13338  |
| 33          | H    | -5.81031                            | 0.81184  | 0.09037  |
| 34          | H    | -1.88347                            | 3.68906  | -0.05713 |
| 35          | H    | 4.35766                             | 0.91606  | -0.40778 |

|    |   |          |          |          |
|----|---|----------|----------|----------|
| 36 | H | 1.23133  | 4.70800  | -1.07596 |
| 37 | H | -0.23525 | 5.18365  | -0.20248 |
| 38 | H | 2.25257  | 4.48717  | 0.87931  |
| 39 | H | -1.86201 | -3.21418 | -0.04049 |
| 40 | H | 1.90838  | -2.86575 | 0.67799  |
| 41 | H | 5.11447  | -2.32546 | -0.38260 |
| 42 | H | 3.06620  | -1.70911 | -2.65837 |
| 43 | H | 3.29198  | -3.31394 | -1.92423 |
| 44 | H | 1.72121  | -2.49175 | -1.78970 |
| 45 | H | 3.10264  | -2.67373 | 2.88732  |
| 46 | H | 2.60206  | -1.09600 | 2.27751  |
| 47 | H | 4.30430  | -1.59658 | 2.13696  |
| 48 | H | 3.820947 | -4.26588 | 1.346483 |

| Conformer B |      | Standard Orientation<br>(Ångstroms) |          |          |
|-------------|------|-------------------------------------|----------|----------|
| I           | Atom | X                                   | Y        | Z        |
| 1           | C    | -3.54737                            | -2.3366  | -0.22009 |
| 2           | C    | -4.94809                            | -2.46546 | -0.17003 |
| 3           | C    | -5.74842                            | -1.34663 | 0.009451 |
| 4           | C    | -5.17457                            | -0.07415 | 0.143841 |
| 5           | C    | -3.79081                            | 0.068518 | 0.09455  |
| 6           | C    | -2.94679                            | -1.05647 | -0.08974 |
| 7           | C    | -3.20073                            | 1.41994  | 0.239285 |
| 8           | C    | -1.70958                            | 1.550907 | 0.163822 |
| 9           | C    | -0.88186                            | 0.431759 | -0.02237 |
| 10          | C    | -1.48248                            | -0.92613 | -0.1476  |
| 11          | C    | -1.16719                            | 2.834716 | 0.288231 |
| 12          | C    | 0.199476                            | 3.072467 | 0.218707 |
| 13          | C    | 1.073155                            | 1.967559 | 0.014389 |
| 14          | C    | 0.51655                             | 0.672099 | -0.08191 |
| 15          | O    | -0.77435                            | -1.94016 | -0.30254 |
| 16          | O    | -3.90067                            | 2.416004 | 0.415241 |
| 17          | C    | 2.548818                            | 2.104278 | -0.08735 |
| 18          | C    | 3.293643                            | 0.871253 | -0.17565 |
| 19          | C    | 2.660352                            | -0.31988 | -0.25675 |
| 20          | O    | 1.312478                            | -0.41913 | -0.23404 |
| 21          | O    | 3.129039                            | 3.209333 | -0.10108 |
| 22          | C    | 3.309126                            | -1.67811 | -0.42372 |
| 23          | C    | 0.678432                            | 4.506016 | 0.397448 |
| 24          | O    | 1.290887                            | 5.054339 | -0.76668 |



|    |   |          |          |          |
|----|---|----------|----------|----------|
| 25 | O | -2.82941 | -3.46099 | -0.39385 |
| 26 | C | 2.918965 | -2.62549 | 0.755599 |
| 27 | O | 4.718533 | -1.45879 | -0.40604 |
| 28 | C | 2.883171 | -2.28697 | -1.77616 |
| 29 | C | 3.153284 | -2.03616 | 2.144022 |
| 30 | O | 3.739924 | -3.78892 | 0.541876 |
| 31 | H | -5.37773 | -3.45699 | -0.27457 |
| 32 | H | -6.82797 | -1.45886 | 0.04635  |
| 33 | H | -5.79402 | 0.804224 | 0.285422 |
| 34 | H | -1.85261 | 3.660968 | 0.441929 |
| 35 | H | 4.374294 | 0.911756 | -0.20983 |
| 36 | H | -0.18758 | 5.134645 | 0.61655  |
| 37 | H | 1.363668 | 4.561749 | 1.253288 |
| 38 | H | 2.161663 | 4.606651 | -0.81367 |
| 39 | H | -1.87184 | -3.18924 | -0.40377 |
| 40 | H | 1.863598 | -2.89764 | 0.636816 |
| 41 | H | 5.120453 | -2.33178 | -0.24237 |
| 42 | H | 3.185076 | -1.62254 | -2.59194 |
| 43 | H | 3.375389 | -3.25431 | -1.90894 |
| 44 | H | 1.800082 | -2.43484 | -1.81832 |
| 45 | H | 2.940986 | -2.79275 | 2.908941 |
| 46 | H | 2.485612 | -1.18889 | 2.332736 |
| 47 | H | 4.188683 | -1.70077 | 2.262529 |
| 48 | H | 3.738206 | -4.32977 | 1.347832 |

| Conformer C |      | Standard Orientation<br>(Ångstroms) |          |          |
|-------------|------|-------------------------------------|----------|----------|
| I           | Atom | X                                   | Y        | Z        |
| 1           | C    | 3.681998                            | -1.99603 | 0.0476   |
| 2           | C    | 5.088126                            | -1.98001 | -0.02366 |
| 3           | C    | 5.77234                             | -0.77746 | -0.11014 |
| 4           | C    | 5.07449                             | 0.439566 | -0.12609 |
| 5           | C    | 3.684989                            | 0.439361 | -0.06785 |
| 6           | C    | 2.955108                            | -0.77539 | 0.01136  |
| 7           | C    | 2.964144                            | 1.732957 | -0.07153 |
| 8           | C    | 1.465292                            | 1.705411 | -0.06794 |
| 9           | C    | 0.750232                            | 0.495345 | -0.04669 |
| 10          | C    | 1.488958                            | -0.78885 | 0.067075 |
| 11          | C    | 0.801896                            | 2.935316 | -0.10852 |
| 12          | C    | -0.58336                            | 3.027107 | -0.11657 |
| 13          | C    | -1.34478                            | 1.82517  | -0.11001 |

|    |   |          |          |          |
|----|---|----------|----------|----------|
| 14 | C | -0.66722 | 0.584838 | -0.11296 |
| 15 | O | 0.893015 | -1.87709 | 0.222863 |
| 16 | O | 3.561822 | 2.807304 | -0.08892 |
| 17 | C | -2.82715 | 1.809447 | -0.11333 |
| 18 | C | -3.44447 | 0.512587 | -0.26445 |
| 19 | C | -2.71199 | -0.62215 | -0.30746 |
| 20 | O | -1.35606 | -0.58657 | -0.20159 |
| 21 | O | -3.52048 | 2.838871 | 0.004915 |
| 22 | C | -3.22946 | -2.04721 | -0.49974 |
| 23 | C | -1.20151 | 4.416439 | -0.17599 |
| 24 | O | -1.92719 | 4.768137 | 0.999045 |
| 25 | O | 3.089433 | -3.19883 | 0.144383 |
| 26 | C | -2.70158 | -3.0214  | 0.614342 |
| 27 | O | -2.73495 | -2.51283 | -1.76272 |
| 28 | C | -4.75648 | -2.08835 | -0.57133 |
| 29 | C | -2.79888 | -2.48562 | 2.040988 |
| 30 | O | -1.3813  | -3.46464 | 0.288615 |
| 31 | H | 5.614013 | -2.92947 | -0.00333 |
| 32 | H | 6.857107 | -0.77902 | -0.16039 |
| 33 | H | 5.603133 | 1.384363 | -0.18239 |
| 34 | H | 1.404921 | 3.836373 | -0.12987 |
| 35 | H | -4.52428 | 0.479232 | -0.32421 |
| 36 | H | -0.39678 | 5.148495 | -0.27371 |
| 37 | H | -1.84367 | 4.496707 | -1.06239 |
| 38 | H | -2.74973 | 4.238633 | 0.943168 |
| 39 | H | 2.112623 | -3.03858 | 0.209231 |
| 40 | H | -3.31411 | -3.92424 | 0.525803 |
| 41 | H | -1.90626 | -2.99419 | -1.56064 |
| 42 | H | -5.12182 | -1.48803 | -1.40989 |
| 43 | H | -5.0689  | -3.1232  | -0.73608 |
| 44 | H | -5.22377 | -1.72748 | 0.349418 |
| 45 | H | -2.49994 | -3.27008 | 2.743438 |
| 46 | H | -3.82469 | -2.18759 | 2.283235 |
| 47 | H | -2.14447 | -1.62094 | 2.197373 |
| 48 | H | -0.73181 | -2.74224 | 0.415783 |

| Conformer D |      | Standard Orientation<br>(Ångstroms) |          |          |
|-------------|------|-------------------------------------|----------|----------|
| I           | Atom | X                                   | Y        | Z        |
| 1           | C    | -3.21885                            | -2.71612 | -0.09749 |
| 2           | C    | -4.59846                            | -2.98774 | -0.03872 |

|    |   |          |          |          |
|----|---|----------|----------|----------|
| 3  | C | -5.51312 | -1.94926 | 0.060981 |
| 4  | C | -5.07678 | -0.61754 | 0.105029 |
| 5  | C | -3.71476 | -0.33419 | 0.04785  |
| 6  | C | -2.75658 | -1.37432 | -0.05531 |
| 7  | C | -3.2701  | 1.07943  | 0.097468 |
| 8  | C | -1.79949 | 1.360451 | 0.031722 |
| 9  | C | -0.85858 | 0.320366 | -0.07552 |
| 10 | C | -1.31232 | -1.09453 | -0.11883 |
| 11 | C | -1.40022 | 2.698986 | 0.080243 |
| 12 | C | -0.06043 | 3.067919 | 0.024865 |
| 13 | C | 0.92419  | 2.049146 | -0.08693 |
| 14 | C | 0.507048 | 0.700846 | -0.13545 |
| 15 | O | -0.50207 | -2.03914 | -0.20685 |
| 16 | O | -4.07581 | 2.004637 | 0.189579 |
| 17 | C | 2.378875 | 2.344551 | -0.15436 |
| 18 | C | 3.250204 | 1.192761 | -0.26349 |
| 19 | C | 2.746856 | -0.05912 | -0.3052  |
| 20 | O | 1.416183 | -0.30457 | -0.24557 |
| 21 | O | 2.824543 | 3.503568 | -0.11893 |
| 22 | C | 3.533451 | -1.34543 | -0.45082 |
| 23 | C | 0.303237 | 4.534939 | 0.08539  |
| 24 | O | -0.89092 | 5.312214 | 0.200325 |
| 25 | O | -2.38494 | -3.76799 | -0.19415 |
| 26 | C | 3.269453 | -2.29707 | 0.759595 |
| 27 | O | 4.912609 | -0.97908 | -0.46884 |
| 28 | C | 3.152388 | -2.03417 | -1.7781  |
| 29 | C | 3.457438 | -1.64646 | 2.127662 |
| 30 | O | 4.211276 | -3.36861 | 0.561373 |
| 31 | H | -4.92124 | -4.02378 | -0.07369 |
| 32 | H | -6.57528 | -2.17154 | 0.105082 |
| 33 | H | -5.78584 | 0.198883 | 0.18334  |
| 34 | H | -2.16158 | 3.462084 | 0.163751 |
| 35 | H | 4.320298 | 1.345697 | -0.31212 |
| 36 | H | 0.966269 | 4.716169 | 0.939542 |
| 37 | H | 0.861757 | 4.815458 | -0.81541 |
| 38 | H | -0.6324  | 6.245963 | 0.240287 |
| 39 | H | -1.46174 | -3.39555 | -0.22456 |
| 40 | H | 2.249372 | -2.6881  | 0.66819  |
| 41 | H | 5.405941 | -1.80098 | -0.29093 |
| 42 | H | 3.368927 | -1.36482 | -2.61672 |
| 43 | H | 3.742746 | -2.94718 | -1.89447 |
| 44 | H | 2.090591 | -2.29684 | -1.79618 |
| 45 | H | 3.347587 | -2.40035 | 2.916599 |

|    |   |          |          |          |
|----|---|----------|----------|----------|
| 46 | H | 2.698716 | -0.87748 | 2.30719  |
| 47 | H | 4.448439 | -1.18962 | 2.216708 |
| 48 | H | 4.289592 | -3.87685 | 1.38437  |

| Conformer E |      | Standard Orientation<br>(Ångstroms) |          |          |
|-------------|------|-------------------------------------|----------|----------|
| I           | Atom | X                                   | Y        | Z        |
| 1           | C    | 3.688708                            | -1.98269 | -0.14595 |
| 2           | C    | 5.094391                            | -1.95292 | -0.22172 |
| 3           | C    | 5.77326                             | -0.7448  | -0.18629 |
| 4           | C    | 5.070301                            | 0.464048 | -0.07217 |
| 5           | C    | 3.681137                            | 0.451327 | -0.00721 |
| 6           | C    | 2.956511                            | -0.76827 | -0.05143 |
| 7           | C    | 2.954893                            | 1.734301 | 0.129679 |
| 8           | C    | 1.45595                             | 1.699229 | 0.137594 |
| 9           | C    | 0.744847                            | 0.491097 | 0.032824 |
| 10          | C    | 1.49051                             | -0.79439 | 0.009295 |
| 11          | C    | 0.788502                            | 2.922859 | 0.241736 |
| 12          | C    | -0.59694                            | 3.012582 | 0.228586 |
| 13          | C    | -1.35379                            | 1.818166 | 0.069642 |
| 14          | C    | -0.67334                            | 0.582002 | -0.02139 |
| 15          | O    | 0.900833                            | -1.8963  | 0.048278 |
| 16          | O    | 3.547662                            | 2.807324 | 0.224526 |
| 17          | C    | -2.83502                            | 1.805266 | 0.010954 |
| 18          | C    | -3.45377                            | 0.504713 | -0.09073 |
| 19          | C    | -2.72027                            | -0.62421 | -0.20568 |
| 20          | O    | -1.36071                            | -0.58392 | -0.17579 |
| 21          | O    | -3.52778                            | 2.841876 | 0.033941 |
| 22          | C    | -3.24452                            | -2.04248 | -0.42983 |
| 23          | C    | -1.21575                            | 4.391821 | 0.408342 |
| 24          | O    | -1.92742                            | 4.857029 | -0.73493 |
| 25          | O    | 3.101844                            | -3.19184 | -0.17262 |
| 26          | C    | -2.658                              | -3.06021 | 0.613473 |
| 27          | O    | -2.81793                            | -2.45344 | -1.73556 |
| 28          | C    | -4.77331                            | -2.08647 | -0.42029 |
| 29          | C    | -2.67661                            | -2.58069 | 2.063156 |
| 30          | O    | -1.35893                            | -3.49038 | 0.198484 |
| 31          | H    | 5.623967                            | -2.89702 | -0.30325 |
| 32          | H    | 6.857708                            | -0.73589 | -0.24192 |
| 33          | H    | 5.595108                            | 1.411791 | -0.03215 |
| 34          | H    | 1.388629                            | 3.820903 | 0.33801  |

|    |   |          |          |          |
|----|---|----------|----------|----------|
| 35 | H | -4.53481 | 0.469405 | -0.11427 |
| 36 | H | -1.86715 | 4.389471 | 1.291776 |
| 37 | H | -0.41111 | 5.109161 | 0.584145 |
| 38 | H | -2.75248 | 4.328585 | -0.73936 |
| 39 | H | 2.124535 | -3.04337 | -0.08927 |
| 40 | H | -3.27629 | -3.95895 | 0.522977 |
| 41 | H | -1.98259 | -2.94569 | -1.59803 |
| 42 | H | -5.18457 | -1.45837 | -1.21605 |
| 43 | H | -5.0927  | -3.11589 | -0.60471 |
| 44 | H | -5.19099 | -1.76029 | 0.536639 |
| 45 | H | -2.34426 | -3.3926  | 2.717779 |
| 46 | H | -3.68662 | -2.28913 | 2.370814 |
| 47 | H | -2.01101 | -1.72429 | 2.217878 |
| 48 | H | -0.70208 | -2.77236 | 0.312765 |

**Figure S40.** Cartesian coordinates of the low-energy reoptimized conformers of **2b** calculated at B3LYP/6-31+G(d) level of theory.

| Conformer A |      | Standard Orientation<br>(Ångstroms) |          |          |
|-------------|------|-------------------------------------|----------|----------|
| I           | Atom | X                                   | Y        | Z        |
| 1           | C    | -3.53201                            | -2.34761 | 0.030493 |
| 2           | C    | -4.93059                            | -2.49422 | 0.068608 |
| 3           | C    | -5.74927                            | -1.37001 | 0.068489 |
| 4           | C    | -5.18796                            | -0.08165 | 0.031024 |
| 5           | C    | -3.80155                            | 0.074877 | -0.0079  |
| 6           | C    | -2.94137                            | -1.05701 | -0.01106 |
| 7           | C    | -3.22416                            | 1.431041 | -0.04156 |
| 8           | C    | -1.7397                             | 1.571834 | -0.0781  |
| 9           | C    | -0.89491                            | 0.44368  | -0.09738 |
| 10          | C    | -1.48235                            | -0.91581 | -0.05303 |
| 11          | C    | -1.20884                            | 2.868427 | -0.0988  |
| 12          | C    | 0.162688                            | 3.112762 | -0.12255 |
| 13          | C    | 1.052666                            | 1.999267 | -0.13285 |
| 14          | C    | 0.499841                            | 0.695841 | -0.14957 |
| 15          | O    | -0.75488                            | -1.96145 | -0.04044 |
| 16          | O    | -3.95259                            | 2.454874 | -0.04113 |
| 17          | C    | 2.52795                             | 2.132642 | -0.14056 |
| 18          | C    | 3.296261                            | 0.92021  | -0.26182 |
| 19          | C    | 2.695575                            | -0.29243 | -0.29799 |
| 20          | O    | 1.326339                            | -0.4069  | -0.22971 |

|    |   |          |          |          |
|----|---|----------|----------|----------|
| 21 | O | 3.114182 | 3.260842 | -0.03819 |
| 22 | C | 3.365083 | -1.65161 | -0.4644  |
| 23 | C | 0.62083  | 4.559023 | -0.16786 |
| 24 | O | 1.367204 | 4.968887 | 1.022292 |
| 25 | O | -2.78335 | -3.49636 | 0.035216 |
| 26 | C | 2.832143 | -2.63524 | 0.611147 |
| 27 | O | 4.801858 | -1.47578 | -0.28275 |
| 28 | C | 3.153956 | -2.15625 | -1.89814 |
| 29 | C | 3.336631 | -4.06835 | 0.478545 |
| 30 | O | 3.316707 | -2.02341 | 1.869898 |
| 31 | H | -5.34254 | -3.49605 | 0.098554 |
| 32 | H | -6.82657 | -1.48826 | 0.098596 |
| 33 | H | -5.81924 | 0.798285 | 0.033486 |
| 34 | H | -1.90392 | 3.699226 | -0.09293 |
| 35 | H | 4.373556 | 0.990702 | -0.30682 |
| 36 | H | 1.231173 | 4.734824 | -1.06102 |
| 37 | H | -0.25229 | 5.210244 | -0.20614 |
| 38 | H | 2.257321 | 4.545192 | 0.938454 |
| 39 | H | -1.81196 | -3.24514 | 0.010281 |
| 40 | H | 1.738972 | -2.60509 | 0.600565 |
| 41 | H | 4.982873 | -1.43413 | 0.684156 |
| 42 | H | 3.521046 | -1.41098 | -2.60951 |
| 43 | H | 3.71175  | -3.083   | -2.04886 |
| 44 | H | 2.09329  | -2.33854 | -2.09373 |
| 45 | H | 3.015383 | -4.65297 | 1.348446 |
| 46 | H | 2.917519 | -4.55154 | -0.40969 |
| 47 | H | 4.428713 | -4.10296 | 0.418791 |
| 48 | H | 3.095653 | -2.57204 | 2.647324 |

| Conformer B |      | Standard Orientation<br>(Ångstroms) |          |          |
|-------------|------|-------------------------------------|----------|----------|
| I           | Atom | X                                   | Y        | Z        |
| 1           | C    | -3.5368                             | -2.33653 | -0.18526 |
| 2           | C    | -4.93615                            | -2.48012 | -0.17107 |
| 3           | C    | -5.7502                             | -1.35981 | -0.04289 |
| 4           | C    | -5.18349                            | -0.07866 | 0.074518 |
| 5           | C    | -3.79634                            | 0.075069 | 0.058381 |
| 6           | C    | -2.94081                            | -1.05242 | -0.07516 |
| 7           | C    | -3.21323                            | 1.422949 | 0.187633 |
| 8           | C    | -1.72872                            | 1.562923 | 0.148528 |
| 9           | C    | -0.88839                            | 0.441362 | -0.00365 |

|    |   |          |          |          |
|----|---|----------|----------|----------|
| 10 | C | -1.48118 | -0.9132  | -0.0998  |
| 11 | C | -1.19299 | 2.851691 | 0.271328 |
| 12 | C | 0.178104 | 3.096265 | 0.233767 |
| 13 | C | 1.061819 | 1.993239 | 0.049858 |
| 14 | C | 0.506455 | 0.69453  | -0.05038 |
| 15 | O | -0.75793 | -1.95687 | -0.20035 |
| 16 | O | -3.93696 | 2.440849 | 0.325099 |
| 17 | C | 2.534821 | 2.131777 | -0.02434 |
| 18 | C | 3.304742 | 0.917364 | -0.10903 |
| 19 | C | 2.702793 | -0.29157 | -0.20281 |
| 20 | O | 1.33147  | -0.40267 | -0.19918 |
| 21 | O | 3.116717 | 3.266738 | -0.02562 |
| 22 | C | 3.376615 | -1.64494 | -0.39805 |
| 23 | C | 0.643965 | 4.528819 | 0.418416 |
| 24 | O | 1.306456 | 5.080982 | -0.76404 |
| 25 | O | -2.79258 | -3.4814  | -0.3098  |
| 26 | C | 2.804556 | -2.6686  | 0.618612 |
| 27 | O | 4.805634 | -1.47848 | -0.15551 |
| 28 | C | 3.219006 | -2.09405 | -1.8569  |
| 29 | C | 3.311113 | -4.09676 | 0.446296 |
| 30 | O | 3.245095 | -2.10783 | 1.916714 |
| 31 | H | -5.35243 | -3.47659 | -0.26057 |
| 32 | H | -6.82812 | -1.47577 | -0.03186 |
| 33 | H | -5.81107 | 0.797824 | 0.178232 |
| 34 | H | -1.88353 | 3.67617  | 0.400886 |
| 35 | H | 4.382834 | 0.986274 | -0.13174 |
| 36 | H | -0.22201 | 5.166794 | 0.594437 |
| 37 | H | 1.315896 | 4.60067  | 1.281159 |
| 38 | H | 2.200278 | 4.658637 | -0.79219 |
| 39 | H | -1.82016 | -3.23298 | -0.29994 |
| 40 | H | 1.712479 | -2.63488 | 0.570222 |
| 41 | H | 4.949371 | -1.47442 | 0.818502 |
| 42 | H | 3.6081   | -1.32089 | -2.52551 |
| 43 | H | 3.785657 | -3.01273 | -2.02319 |
| 44 | H | 2.166901 | -2.27181 | -2.09744 |
| 45 | H | 2.959628 | -4.71519 | 1.28031  |
| 46 | H | 2.921609 | -4.54216 | -0.47456 |
| 47 | H | 4.404532 | -4.13214 | 0.422181 |
| 48 | H | 2.992637 | -2.6835  | 2.664511 |

| Conformer C |      | Standard Orientation<br>(Ångstroms) |          |          |
|-------------|------|-------------------------------------|----------|----------|
| I           | Atom | X                                   | Y        | Z        |
| 1           | C    | -3.52047                            | -2.39446 | -0.05092 |
| 2           | C    | -4.9148                             | -2.5599  | 0.034921 |
| 3           | C    | -5.7451                             | -1.44685 | 0.112962 |
| 4           | C    | -5.19986                            | -0.15118 | 0.106214 |
| 5           | C    | -3.81736                            | 0.023712 | 0.024948 |
| 6           | C    | -2.94552                            | -1.09615 | -0.05334 |
| 7           | C    | -3.25604                            | 1.386627 | 0.016262 |
| 8           | C    | -1.77419                            | 1.546529 | -0.05196 |
| 9           | C    | -0.91572                            | 0.430466 | -0.11624 |
| 10          | C    | -1.48993                            | -0.93564 | -0.13722 |
| 11          | C    | -1.26139                            | 2.850506 | -0.05302 |
| 12          | C    | 0.105502                            | 3.113733 | -0.101   |
| 13          | C    | 1.010144                            | 2.012609 | -0.13897 |
| 14          | C    | 0.476651                            | 0.700647 | -0.16212 |
| 15          | O    | -0.75383                            | -1.97018 | -0.22831 |
| 16          | O    | -3.99514                            | 2.401426 | 0.068288 |
| 17          | C    | 2.481866                            | 2.169445 | -0.17216 |
| 18          | C    | 3.266114                            | 0.969658 | -0.31711 |
| 19          | C    | 2.684803                            | -0.2531  | -0.33413 |
| 20          | O    | 1.318738                            | -0.39142 | -0.2393  |
| 21          | O    | 3.053994                            | 3.304482 | -0.06936 |
| 22          | C    | 3.393569                            | -1.58819 | -0.43453 |
| 23          | C    | 0.54303                             | 4.566604 | -0.13736 |
| 24          | O    | 1.302482                            | 4.974348 | 1.045402 |
| 25          | O    | -2.75988                            | -3.53267 | -0.12997 |
| 26          | C    | 3.568647                            | -2.22446 | 0.98549  |
| 27          | O    | 4.741818                            | -1.26324 | -0.9118  |
| 28          | C    | 2.701938                            | -2.5264  | -1.43485 |
| 29          | C    | 2.323525                            | -2.83746 | 1.610934 |
| 30          | O    | 4.607997                            | -3.25433 | 0.764669 |
| 31          | H    | -5.31461                            | -3.56708 | 0.036493 |
| 32          | H    | -6.81916                            | -1.57969 | 0.177815 |
| 33          | H    | -5.84042                            | 0.720154 | 0.163657 |
| 34          | H    | -1.96732                            | 3.671272 | -0.01609 |
| 35          | H    | 4.340448                            | 1.051789 | -0.39016 |
| 36          | H    | 1.136517                            | 4.760616 | -1.03801 |
| 37          | H    | -0.33952                            | 5.205863 | -0.15443 |
| 38          | H    | 2.197953                            | 4.567144 | 0.94178  |
| 39          | H    | -1.79379                            | -3.26755 | -0.19236 |



|    |   |          |          |          |
|----|---|----------|----------|----------|
| 40 | H | 3.991894 | -1.4525  | 1.639875 |
| 41 | H | 5.324117 | -2.0044  | -0.62584 |
| 42 | H | 2.723096 | -2.07316 | -2.4306  |
| 43 | H | 3.239886 | -3.47749 | -1.46965 |
| 44 | H | 1.662201 | -2.70639 | -1.15365 |
| 45 | H | 2.560653 | -3.20796 | 2.614297 |
| 46 | H | 1.521327 | -2.0996  | 1.700454 |
| 47 | H | 1.956799 | -3.67417 | 1.009899 |
| 48 | H | 4.998036 | -3.55466 | 1.608723 |

| Conformer D |      | Standard Orientation<br>(Ångstroms) |          |          |
|-------------|------|-------------------------------------|----------|----------|
| I           | Atom | X                                   | Y        | Z        |
| 1           | C    | -3.52561                            | -2.37386 | -0.28117 |
| 2           | C    | -4.9203                             | -2.54189 | -0.20678 |
| 3           | C    | -5.74326                            | -1.44376 | 0.019709 |
| 4           | C    | -5.19036                            | -0.16076 | 0.175292 |
| 5           | C    | -3.8076                             | 0.016487 | 0.104509 |
| 6           | C    | -2.94316                            | -1.08844 | -0.12406 |
| 7           | C    | -3.2386                             | 1.366891 | 0.263413 |
| 8           | C    | -1.75801                            | 1.53066  | 0.180571 |
| 9           | C    | -0.90654                            | 0.427144 | -0.02922 |
| 10          | C    | -1.48766                            | -0.92519 | -0.20108 |
| 11          | C    | -1.23862                            | 2.823947 | 0.325768 |
| 12          | C    | 0.126502                            | 3.090614 | 0.255723 |
| 13          | C    | 1.022472                            | 2.003736 | 0.03667  |
| 14          | C    | 0.486012                            | 0.697421 | -0.07172 |
| 15          | O    | -0.75787                            | -1.94433 | -0.42339 |
| 16          | O    | -3.97042                            | 2.368044 | 0.465792 |
| 17          | C    | 2.489773                            | 2.167944 | -0.06952 |
| 18          | C    | 3.277967                            | 0.966282 | -0.17299 |
| 19          | C    | 2.695209                            | -0.25374 | -0.2457  |
| 20          | O    | 1.325469                            | -0.38941 | -0.21909 |
| 21          | O    | 3.053496                            | 3.311675 | -0.07932 |
| 22          | C    | 3.403278                            | -1.58744 | -0.36609 |
| 23          | C    | 0.575893                            | 4.527232 | 0.449086 |
| 24          | O    | 1.192894                            | 5.106711 | -0.74497 |
| 25          | O    | -2.77178                            | -3.49647 | -0.50853 |
| 26          | C    | 3.539025                            | -2.26245 | 1.039751 |
| 27          | O    | 4.765811                            | -1.25371 | -0.79605 |
| 28          | C    | 2.738008                            | -2.49575 | -1.41079 |

|    |   |          |          |          |
|----|---|----------|----------|----------|
| 29 | C | 2.272115 | -2.8703  | 1.625258 |
| 30 | O | 4.56665  | -3.30246 | 0.813729 |
| 31 | H | -5.32621 | -3.53898 | -0.33053 |
| 32 | H | -6.81763 | -1.57838 | 0.075236 |
| 33 | H | -5.82526 | 0.69923  | 0.34907  |
| 34 | H | -1.93786 | 3.633726 | 0.495213 |
| 35 | H | 4.353731 | 1.048575 | -0.22079 |
| 36 | H | -0.29389 | 5.148853 | 0.661022 |
| 37 | H | 1.273213 | 4.59701  | 1.291504 |
| 38 | H | 2.092459 | 4.70089  | -0.80606 |
| 39 | H | -1.8044  | -3.22984 | -0.54188 |
| 40 | H | 3.960512 | -1.51394 | 1.721962 |
| 41 | H | 5.336166 | -2.0092  | -0.52454 |
| 42 | H | 2.792477 | -2.01651 | -2.39297 |
| 43 | H | 3.272016 | -3.44863 | -1.45385 |
| 44 | H | 1.688935 | -2.6766  | -1.16813 |
| 45 | H | 2.488127 | -3.28467 | 2.616113 |
| 46 | H | 1.486934 | -2.11703 | 1.737132 |
| 47 | H | 1.89277  | -3.67423 | 0.988503 |
| 48 | H | 4.934739 | -3.62936 | 1.657822 |

| Conformer E |      | Standard Orientation<br>(Ångstroms) |          |          |
|-------------|------|-------------------------------------|----------|----------|
| I           | Atom | X                                   | Y        | Z        |
| 1           | C    | -3.49269                            | -2.50103 | 0.141955 |
| 2           | C    | -4.88432                            | -2.70643 | 0.103781 |
| 3           | C    | -5.74402                            | -1.62264 | -0.03069 |
| 4           | C    | -5.23283                            | -0.31585 | -0.13033 |
| 5           | C    | -3.85548                            | -0.09898 | -0.09228 |
| 6           | C    | -2.95216                            | -1.191   | 0.047006 |
| 7           | C    | -3.33639                            | 1.278596 | -0.20126 |
| 8           | C    | -1.86111                            | 1.48511  | -0.14784 |
| 9           | C    | -0.98125                            | 0.39549  | 0.000677 |
| 10          | C    | -1.50476                            | -0.98588 | 0.09173  |
| 11          | C    | -1.36765                            | 2.793467 | -0.25272 |
| 12          | C    | -0.00412                            | 3.08728  | -0.20576 |
| 13          | C    | 0.917498                            | 2.013805 | -0.03297 |
| 14          | C    | 0.397198                            | 0.704528 | 0.051907 |
| 15          | O    | -0.73099                            | -1.99776 | 0.20742  |
| 16          | O    | -4.10508                            | 2.262887 | -0.33451 |
| 17          | C    | 2.389043                            | 2.180227 | 0.044802 |

|    |   |          |          |          |
|----|---|----------|----------|----------|
| 18 | C | 3.18948  | 0.978499 | 0.126354 |
| 19 | C | 2.613381 | -0.24475 | 0.202818 |
| 20 | O | 1.248105 | -0.36545 | 0.187284 |
| 21 | O | 2.946941 | 3.325354 | 0.049911 |
| 22 | C | 3.254322 | -1.61613 | 0.401731 |
| 23 | C | 0.416961 | 4.53546  | -0.37039 |
| 24 | O | 1.078705 | 5.084563 | 0.813346 |
| 25 | O | -2.70282 | -3.61235 | 0.274105 |
| 26 | C | 4.392186 | -1.83534 | -0.63355 |
| 27 | O | 2.265987 | -2.66027 | 0.102621 |
| 28 | C | 3.721258 | -1.75511 | 1.863074 |
| 29 | C | 5.177417 | -3.13077 | -0.43318 |
| 30 | O | 3.79258  | -1.7972  | -1.97342 |
| 31 | H | -5.25725 | -3.72085 | 0.180662 |
| 32 | H | -6.81543 | -1.78554 | -0.05989 |
| 33 | H | -5.89819 | 0.531913 | -0.23731 |
| 34 | H | -2.08519 | 3.595632 | -0.37681 |
| 35 | H | 4.264537 | 1.096296 | 0.151186 |
| 36 | H | 1.07574  | 4.640261 | -1.24016 |
| 37 | H | -0.46813 | 5.152051 | -0.52561 |
| 38 | H | 1.986187 | 4.692373 | 0.824755 |
| 39 | H | -1.74176 | -3.32784 | 0.284648 |
| 40 | H | 5.071758 | -0.97994 | -0.61244 |
| 41 | H | 1.338246 | -2.34096 | 0.217509 |
| 42 | H | 2.89519  | -1.52939 | 2.544639 |
| 43 | H | 4.047498 | -2.78167 | 2.043599 |
| 44 | H | 4.549417 | -1.07246 | 2.080986 |
| 45 | H | 5.876342 | -3.25209 | -1.26633 |
| 46 | H | 5.758963 | -3.10774 | 0.494042 |
| 47 | H | 4.508421 | -3.99672 | -0.40678 |
| 48 | H | 3.034345 | -2.4229  | -1.97998 |
